# Supplementary material for: Survival Outcomes in Older Women with Oestrogen-Receptor-Positive Early-Stage Breast Cancer: Primary Endocrine Therapy vs. Surgery by Comorbidity and Frailty Levels
Source: MDPI journal article supplement (doi:10.3390/cancers16040749), 2024-02-11
Supplement: s1 [file s1]

## Supplementary files

|                                                                                                           |                                                                                                                              |    |
|-----------------------------------------------------------------------------------------------------------|------------------------------------------------------------------------------------------------------------------------------|----|
| Table S1.                                                                                                 | The Strengthening the Reporting of Observational Studies in Epidemiology (STROBE) Statement checklist.....                   | 2  |
| Supplementary Section S1. Code development.....                                                           |                                                                                                                              | 4  |
| Table S2.                                                                                                 | Medical code of breast cancer in CPRD Gold .....                                                                             | 5  |
| Table S3.                                                                                                 | Medical code of breast cancer in CPRD Aurum .....                                                                            | 7  |
| Table S4.                                                                                                 | ICD-10 codes of breast cancer in Cancer Registry .....                                                                       | 9  |
| Table S5.                                                                                                 | OPCS-4 codes for breast cancer and related operation.....                                                                    | 10 |
| Table S6.                                                                                                 | Breast cancer-related medication and BNF codes .....                                                                         | 11 |
| Table S7.                                                                                                 | Read terms for Charlson comorbidity index .....                                                                              | 12 |
| Table S8.                                                                                                 | ICD-10 codes for identifying comorbidities to calculate the Charlson comorbidity index.....                                  | 49 |
| Table S9.                                                                                                 | ICD-10 codes for frailty score .....                                                                                         | 53 |
| Table S10.                                                                                                | Mean value and standardised mean difference of selected covariates in propensity score before and after balance .....        | 56 |
| Table S11.                                                                                                | Tumour characteristics of the study cohort.....                                                                              | 57 |
| Supplementary Section S2.Survival time of study cohort between surgery and PET by levels of frailty ..... |                                                                                                                              | 58 |
| Table S12.                                                                                                | Competing risk regression of all selected covariates for cohort study                                                        | 60 |
| Figure S2.                                                                                                | Cumulative incidence function of competing risk between PET and surgery in three level of hospital frailty risk scores ..... | 61 |
| Figure S3.                                                                                                | Cumulative incidence function of competing risk in high level of frailty between surgery and PET .....                       | 62 |

**Table S1. The Strengthening the Reporting of Observational Studies in Epidemiology (STROBE) Statement checklist**

|                          | Item No. | Recommendation                                                                                                                                                                         | Page No                                         |
|--------------------------|----------|----------------------------------------------------------------------------------------------------------------------------------------------------------------------------------------|-------------------------------------------------|
| Title and abstract       | 1        | (a) Indicate the study’s design with a commonly used term in the title or the abstract                                                                                                 | Title                                           |
|                          |          | (b) Provide in the abstract an informative and balanced summary of what was done and what was found                                                                                    | Abstrac                                         |
| Introduction             |          |                                                                                                                                                                                        |                                                 |
| Background/rationale     | 2        | Explain the scientific background and rationale for the investigation being reported.                                                                                                  | Introduction                                    |
| Objectives               | 3        | State the specific objectives, including any prespecified hypotheses                                                                                                                   | Introduction, final paragraph                   |
| Methods                  |          |                                                                                                                                                                                        |                                                 |
| Study design             | 4        | Present key elements of study design early in the paper                                                                                                                                | Method                                          |
| Setting                  | 5        | Describe the setting, locations, and relevant dates, including recruitment periods, exposure, follow-up, and data collection.                                                          | Data source                                     |
| Participants             | 6        | (a) Give the eligibility criteria and the sources and methods of selection of participants. Describe methods of follow-up                                                              | Study population                                |
|                          |          | (b) For matched studies, give matching criteria and the number of exposed and unexposed                                                                                                | NA                                              |
| Variables                | 7        | Clearly define all outcomes, exposures, predictors, potential confounders, and effect modifiers. Give diagnostic criteria, if applicable.                                              | Treatment exposure, Outcome measure, covariates |
| Data sources/measurement | 8*       | For each variable of interest, give sources of data and details of assessment methods (measurement). Describe the comparability of assessment methods if there is more than one group. | Covariates                                      |
| Bias                     | 9        | Describe any efforts to address potential sources of bias                                                                                                                              | Data analysis                                   |
| Study size               | 10       | Explain how the study size was arrived at                                                                                                                                              | Results, characteristics of the study cohort    |
| Quantitative variables   | 11       | Explain how quantitative variables were handled in the analyses. If applicable, describe which groupings were chosen and why                                                           | Covariates                                      |
| Statistical methods      | 12       | (a) Describe all statistical methods, including those used to control for confounding                                                                                                  | Data analysis                                   |
|                          |          | (b) Describe any methods used to examine subgroups and interactions                                                                                                                    | Data analysis                                   |
|                          |          | (c) Explain how missing data were addressed                                                                                                                                            | Data analysis                                   |
|                          |          | (d) If applicable, explain how the loss to follow-up was addressed                                                                                                                     |                                                 |
|                          |          | (e) Describe any sensitivity analyses                                                                                                                                                  | Data analysis                                   |
| Results                  |          |                                                                                                                                                                                        |                                                 |

|                  |     |                                                                                                                                                                                                                                                                                                                            |                                                                                                                                                             |
|------------------|-----|----------------------------------------------------------------------------------------------------------------------------------------------------------------------------------------------------------------------------------------------------------------------------------------------------------------------------|-------------------------------------------------------------------------------------------------------------------------------------------------------------|
| Participants     | 13* | <p>(a) Report numbers of individuals at each stage of the study, e.g., numbers potentially eligible, examined for eligibility, confirmed eligible, included in the study, completing follow-up, and analysed</p> <p>(b) Give reasons for non-participation at each stage</p> <p>(c) Consider the use of a flow diagram</p> | <p>Results, characteristics of the study cohort</p> <p>Figure 2</p> <p>Figure 2</p>                                                                         |
| Descriptive data | 14* | <p>(a) Give characteristics of study participants (e.g., demographic, clinical, social) and information on exposures and potential confounders</p> <p>(b) Indicate the number of participants with missing data for each variable of interest</p> <p>(c) Summarise follow-up time (e.g., average and total amount)</p>     | <p>Results, characteristics of the study cohort</p> <p>Results, characteristics of the study cohort</p> <p>Results, characteristics of the study cohort</p> |
| Outcome data     | 15* | Report numbers of outcome events or summary measures over time                                                                                                                                                                                                                                                             | Results                                                                                                                                                     |

## Supplementary Section S1. Code development

A population with site-specific cancer was identified from patients with cancer by applying relevant cancer-related codes in CPRD (GOLD and Aurum), HES APC and NCRAS. The cancer-related code list for CPRD was developed by applying cancer-related terms and an algorithm previously developed by the research team to search the CPRD GOLD dictionary (Read codes) and the CPRD Aurum dictionary (SNOMED and EMIS codes) (Figure S1). Two clinicians at the Christie NHS Foundation Trust Manchester (a tertiary cancer hospital in Northwest England) reviewed and confirmed the final code list. The cancer-related ICD-10 code list was applied to NCRAS and HES datasets to identify patients with cancer. Patients were enrolled when the incident cancer (i.e., the first code for cancer) was identified in any linked databases (HES APC and NCRAS).

**Figure S1. Procedure for code list development**

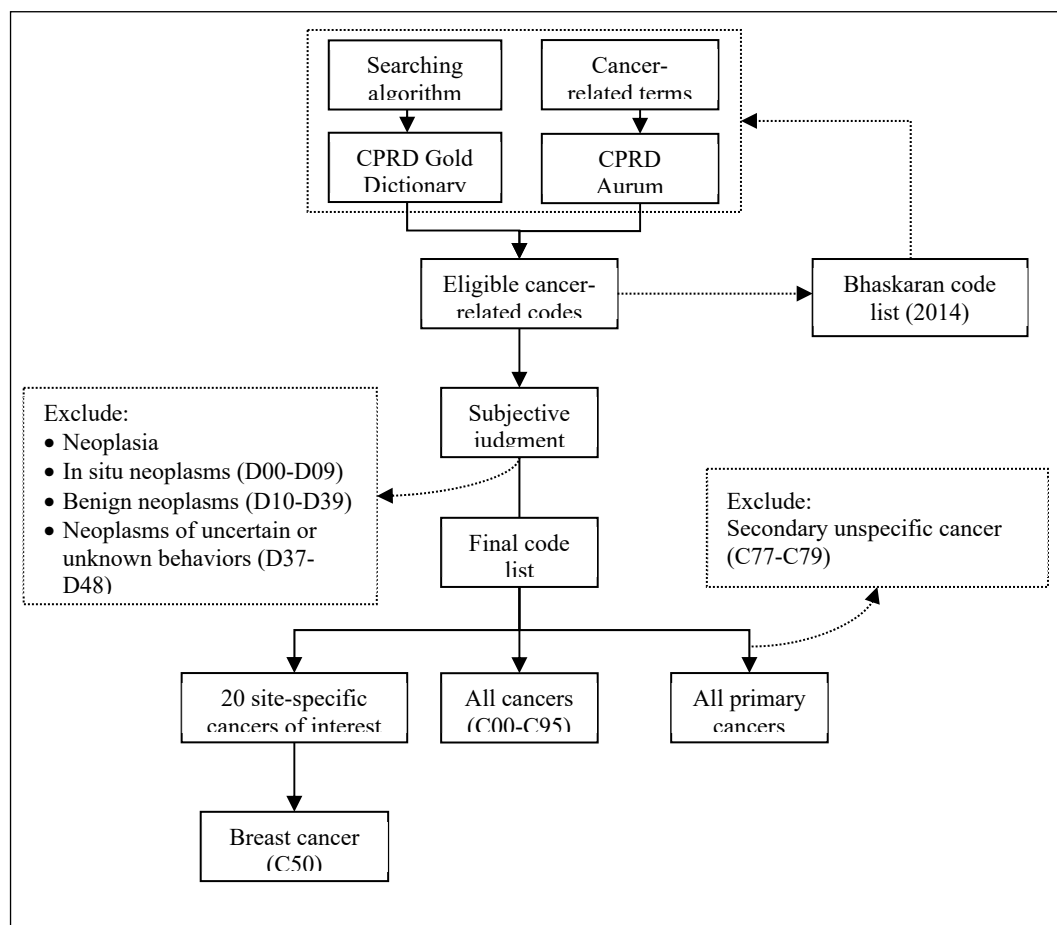

(Note): Bhaskaran code list (2014) [39]

**Table S2. Medical code of breast cancer in CPRD Gold**

| Terms of disease                                            | Medical code |
|-------------------------------------------------------------|--------------|
| Malignant neoplasm of female breast                         | 3968         |
| Ca female breast                                            | 348          |
| Malignant neoplasm of nipple and areola of female breast    | 26853        |
| Malignant neoplasm of nipple of female breast               | 23380        |
| Malignant neoplasm of areola of female breast               | 64686        |
| Malignant neoplasm of nipple or areola of female breast NOS | 59831        |
| Malignant neoplasm of central part of female breast         | 31546        |
| Malignant neoplasm of upper-inner quadrant of female breast | 29826        |
| Malignant neoplasm of lower-inner quadrant of female breast | 45222        |
| Malignant neoplasm of upper-outer quadrant of female breast | 23399        |
| Malignant neoplasm of lower-outer quadrant of female breast | 42070        |
| Malignant neoplasm of axillary tail of female breast        | 20685        |
| Malignant neoplasm, overlapping lesion of breast            | 49148        |
| Malignant neoplasm of other site of female breast           | 56715        |
| Malignant neoplasm of ectopic site of female breast         | 95057        |
| Malignant neoplasm of other site of female breast NOS       | 38475        |
| Malignant neoplasm of female breast NOS                     | 9470         |
| Malignant neoplasm of male breast                           | 19423        |
| Malignant neoplasm of nipple and areola of male breast      | 54494        |
| Malignant neoplasm of nipple of male breast                 | 68480        |
| Malignant neoplasm of areola of male breast                 | 67884        |
| Malignant neoplasm of other site of male breast             | 54202        |
| Malignant neoplasm of ectopic site of male breast           | 95323        |
| Malignant neoplasm of male breast NOS                       | 48809        |
| Local recurrence of malignant tumour of breast              | 105488       |
| [M]Infiltrating duct carcinoma                              | 8351         |
| [M]Intraductal papillary adenocarcinoma with invasion       | 30189        |
| [M]Infiltrating duct and lobular carcinoma                  | 39760        |
| [M]Comedocarcinoma, noninfiltrating                         | 62871        |
| [M]Comedocarcinoma NOS                                      | 58131        |
| [M]Juvenile breast carcinoma                                | 40359        |
| [M]Secretory breast carcinoma                               | 67701        |
| [M]Noninfiltrating intraductal papillary adenocarcinoma     | 102593       |
| [M]Medullary carcinoma with lymphoid stroma                 | 98883        |
| [M]Lobular carcinoma NOS                                    | 12427        |
| [M]Infiltrating ductular carcinoma                          | 7319         |
| [M]Inflammatory carcinoma                                   | 32472        |
| [M]Paget's disease, mammary                                 | 12300        |
| [M]Paget's disease, breast                                  | 60803        |
| [M]Paget's disease and infiltrating breast duct carcinoma   | 42542        |
| [M]Paget's disease and intraductal carcinoma of breast      | 12480        |
| [M]Cystosarcoma phyllodes NOS                               | 39312        |

| Terms of disease                     | Medical code |
|--------------------------------------|--------------|
| [M]Cystosarcoma phyllodes, malignant | 59251        |
| [X]Malignant neoplasm of breast      | 12499        |

**Table S3. Medical code of breast cancer in CPRD Aurum**

| Terms of disease                                            | Medical code     |
|-------------------------------------------------------------|------------------|
| Local recurrence of malignant tumour of breast              | 1803781000006110 |
| [RFC] Breast cancer                                         | 907341000006116  |
| Malignant neoplasm of female breast                         | 1210642019       |
| Ca female breast                                            | 531851000006119  |
| Ca breast - NOS                                             | 990571000006118  |
| Carcinoma breast                                            | 880261000006119  |
| Malignant neoplasm of nipple and areola of female breast    | 289137018        |
| Ca breast - nipple/central                                  | 880271000006114  |
| Malignant neoplasm of nipple of female breast               | 155417012        |
| Malignant neoplasm of areola of female breast               | 155089014        |
| Malignant neoplasm of nipple or areola of female breast NOS | 289140018        |
| Malignant neoplasm of central part of female breast         | 289141019        |
| Malignant neoplasm of upper-inner quadrant of female breast | 289142014        |
| Ca breast-upper,inner quadrant                              | 880281000006112  |
| Malignant neoplasm of lower-inner quadrant of female breast | 289143016        |
| Ca breast-lower,inner quadrant                              | 880291000006110  |
| Malignant neoplasm of upper-outer quadrant of female breast | 289144010        |
| Ca breast-upper,outer quadrant                              | 880301000006111  |
| Malignant neoplasm of lower-outer quadrant of female breast | 289145011        |
| Ca breast-lower,outer quadrant                              | 880311000006114  |
| Malignant neoplasm of axillary tail of female breast        | 289146012        |
| Ca breast - axillary tail                                   | 880321000006118  |
| Malignant neoplasm, overlapping lesion of breast            | 289147015        |
| Malignant neoplasm of other site of female breast           | 289148013        |
| Malignant neoplasm of ectopic site of female breast         | 289149017        |
| Malignant neoplasm of other site of female breast NOS       | 289150017        |
| Malignant neoplasm of female breast NOS                     | 289151018        |
| Ca breast - NOS                                             | 880331000006115  |
| Malignant neoplasm of male breast                           | 155364013        |
| Ca breast - male                                            | 880341000006113  |
| Malignant neoplasm of nipple and areola of male breast      | 289153015        |
| Malignant neoplasm of nipple of male breast                 | 155418019        |
| Malignant neoplasm of areola of male breast                 | 155090017        |
| Malignant neoplasm of nipple or areola of male breast NOS   | 289156011        |
| Malignant neoplasm of other site of male breast             | 289157019        |
| Malignant neoplasm of ectopic site of male breast           | 289158012        |
| Malignant neoplasm of male breast NOS                       | 289159016        |
| Local recurrence of malignant tumour of breast              | 459378019        |
| [M]Infiltrating duct carcinoma                              | 310311000006110  |
| [M]Intraductal papillary adenocarcinoma with invasion       | 1232564019       |
| [M]Infiltrating duct and lobular carcinoma                  | 1228259019       |
| [M]Comedocarcinoma, noninfiltrating                         | 307131000006115  |
| [M]Comedocarcinoma NOS                                      | 291536017        |
| [M]Juvenile breast carcinoma                                | 310741000006110  |

| <b>Terms of disease</b>                                   | <b>Medical code</b> |
|-----------------------------------------------------------|---------------------|
| [M]Secretory breast carcinoma                             | 316311000006112     |
| [M]Noninfiltrating intraductal papillary adenocarcinoma   | 314091000006113     |
| [M]Noninfiltrating intracystic carcinoma                  | 314081000006110     |
| [M]Medullary carcinoma with lymphoid stroma               | 312171000006116     |
| [M]Lobular carcinoma NOS                                  | 291540014           |
| [M]Infiltrating ductular carcinoma                        | 310321000006119     |
| [M]Inflammatory carcinoma                                 | 310341000006114     |
| [M]Paget's disease, mammary                               | 314711000006117     |
| [M]Paget's disease, breast                                | 314691000006115     |
| [M]Paget's disease and infiltrating breast duct carcinoma | 314671000006116     |
| [M]Paget's disease and intraductal carcinoma of breast    | 1231363012          |
| [M]Cystosarcoma phyllodes NOS                             | 291695012           |
| [M]Cystosarcoma phyllodes, malignant                      | 307441000006115     |
| [X]Malignant neoplasm of breast                           | 292137017           |



**Table S4. ICD-10 codes of breast cancer in Cancer Registry**

| <b>Disease term</b>                                | <b>ICD-10 codes</b> |
|----------------------------------------------------|---------------------|
| Malignant neoplasm of breast                       | C50                 |
| Malignant neoplasm: Nipple and areola              | C50.0               |
| Malignant neoplasm: Central portion of breast      | C50.1               |
| Malignant neoplasm: Upper-inner quadrant of breast | C50.2               |
| Malignant neoplasm: Lower-inner quadrant of breast | C50.3               |
| Malignant neoplasm: Upper-outer quadrant of breast | C50.4               |
| Malignant neoplasm: Lower-outer quadrant of breast | C50.5               |
| Malignant neoplasm: Axillary tail of breast        | C50.6               |
| Malignant neoplasm: Overlapping lesion of breast   | C50.8               |
| Malignant neoplasm: Breast, unspecified            | C50.9               |

**Table S5. OPCS-4 codes for breast cancer and related operation**

| Strategy | OPCS | Term                                                                                                     |
|----------|------|----------------------------------------------------------------------------------------------------------|
| Surgery  | B271 | Total mastectomy and excision of both pectoral muscles and part of the chest wall                        |
|          | B272 | Radical mastectomy/total mastectomy and excision of both pectoral muscles NEC.                           |
|          | B273 | Total mastectomy and excision of pectoralis minor muscle                                                 |
|          | B274 | Total mastectomy NEC, inc toilet and simple mastectomy, extended simple mastectomy.                      |
|          | B275 | Subcutaneous mastectomy                                                                                  |
|          | B276 | Skin sparing mastectomy                                                                                  |
|          | B278 | Total excision of breast other specified.                                                                |
|          | B279 | Unspecified, Mastectomy NEC.                                                                             |
|          | B281 | Quadrantectomy of breast                                                                                 |
|          | B282 | Partial excision of breast, Partial mastectomy, WLE, includes wedge or segmental excision of breast NEC. |
|          | B283 | Excision of lesion of the breast, includes lumpectomy, excision biopsy.                                  |
|          | B284 | Re-excision of breast margins                                                                            |
|          | B285 | Wire guided partial excision of breast                                                                   |
|          | B286 | Excision of accessory breast tissue                                                                      |
|          | B288 | Other specified other excision of breast                                                                 |
|          | B289 | Unspecified other excision of breast                                                                     |
|          | B341 | Subareolar excision of mamillary duct                                                                    |
|          | B342 | Excision of mamillary duct NEC                                                                           |
|          | B343 | Excision of lesion of mamillary duct nec. Microdochectomy.                                               |
|          | B352 | Excision of nipple                                                                                       |
|          | B353 | Extirpation/removal of lesion of nipple.                                                                 |
|          | B374 | Capsulectomy of breast                                                                                   |
|          | B401 | Interstitial laser destruction of lesion of breast                                                       |
|          | B408 | Destruction of lesion of breast, Other specified                                                         |
|          | B409 | Destruction of lesion of breast, Unspecified                                                             |

**Table S6. Breast cancer-related medication and BNF codes**

| Type | Code        | Description          | BNF Code  |
|------|-------------|----------------------|-----------|
| Drug | Tamoxifen   | Anti-oestrogens      | 0803041S0 |
|      | Anastrozole | Aromatase inhibitors | 0803041B0 |
|      | Letrozole   | Aromatase inhibitors | 0803041L0 |
|      | Exemestane  | Aromatase inhibitors | 0803041C0 |

**Table S7. Read terms for Charlson comorbidity index**

| Read/OXMIS term                                              | Disease category | Charlson score weight |
|--------------------------------------------------------------|------------------|-----------------------|
| HIV disease resulting in unspecified malignant neoplasm      | AIDS             | 6                     |
| HIV disease resulting in multiple diseases CE                | AIDS             | 6                     |
| [X]Human immunodeficiency virus disease                      | AIDS             | 6                     |
| HIV disease resulting in mycobacterial infection             | AIDS             | 6                     |
| Human immunodeficiency virus with neurological disease       | AIDS             | 6                     |
| [X]HIV disease resulting in other non-Hodgkin's lymphoma     | AIDS             | 6                     |
| HIV disease resulting/unspcf infectious disease              | AIDS             | 6                     |
| Acquired human immunodeficiency virus infection syndrome NOS | AIDS             | 6                     |
| [X]HIV disease resulting in unspecified malignant neoplasm   | AIDS             | 6                     |
| [X]HIV disease resulting in multiple infections              | AIDS             | 6                     |
| HIV disease resulting in candidiasis                         | AIDS             | 6                     |
| Human immunodeficiency virus with secondary infection        | AIDS             | 6                     |
| [X]HIV disease resulting in other bacterial infections       | AIDS             | 6                     |
| [X]Unspecified human immunodeficiency virus [HIV] disease    | AIDS             | 6                     |
| [X]HIV disease resulting in other specified conditions       | AIDS             | 6                     |
| HIV disease resulting in Burkitt's lymphoma                  | AIDS             | 6                     |
| [X]HIV disease resulting in other mycoses                    | AIDS             | 6                     |
| HIV disease resulting in lymphoid interstitial pneumonitis   | AIDS             | 6                     |
| Human immunodef virus resulting in other disease             | AIDS             | 6                     |
| HIV disease resulting in wasting syndrome                    | AIDS             | 6                     |
| [X]HIV disease resulting in other viral infections           | AIDS             | 6                     |
| Human immunodeficiency virus with constitutional disease     | AIDS             | 6                     |
| Acquired immune deficiency syndrome                          | AIDS             | 6                     |
| [X]HIV disease result/haematological???? abnorms,NEC         | AIDS             | 6                     |
| AIDS                                                         | AIDS             | 6                     |
| HIV disease resulting in cytomegaloviral disease             | AIDS             | 6                     |
| HIV disease resulting in Kaposi's sarcoma                    | AIDS             | 6                     |
| HIV infection with persistent generalised lymphadenopathy    | AIDS             | 6                     |
| HIV disease result/haematological???? abnorms,NEC            | AIDS             | 6                     |
| Human immunodeficiency virus with other clinical findings    | AIDS             | 6                     |
| Human immunodeficiency virus with secondary cancers          | AIDS             | 6                     |
| ACQUIRED IMMUNE DEFICIENCY SYNDROME                          | AIDS             | 6                     |
| HIV disease resulting in Pneumocystis carinii pneumonia      | AIDS             | 6                     |
| [X]HIV disease resulting/unspcf infectious??? disease        | AIDS             | 6                     |
| HIV dis reslt/oth mal neopl/lymph,h'matopoetc? tissu         | AIDS             | 6                     |

| <b>Read/OXMIS term</b>                                   | <b>Disease category</b> | <b>Charlson score weight</b> |
|----------------------------------------------------------|-------------------------|------------------------------|
| [X]HIV dis reslt/oth mal neopl/lymph,h'matopoetic? tissu | AIDS                    | 6                            |
| Asymptomatic human immunodeficiency virus infection      | AIDS                    | 6                            |
| [X]HIV disease resulting in other malignant neoplasms    | AIDS                    | 6                            |
| [X]HIV disease resulting/other infectious??? diseases    | AIDS                    | 6                            |
| HIV disease resulting in multiple infections             | AIDS                    | 6                            |
| HIV disease resulting in multiple malignant neoplasms    | AIDS                    | 6                            |
| [X]HIV disease resulting in multiple diseases CE         | AIDS                    | 6                            |
| Cerebrovascular disease NOS                              | Cerebrovascular disease | 1                            |
| Intracranial haemorrhage NOS                             | Cerebrovascular disease | 1                            |
| Cerebellar haemorrhage                                   | Cerebrovascular disease | 1                            |
| Cerebrovascular disease                                  | Cerebrovascular disease | 1                            |
| Other cerebrovascular disease                            | Cerebrovascular disease | 1                            |
| Right sided intracerebral haemorrhage, unspecified       | Cerebrovascular disease | 1                            |
| MENINGEAL HAEMORRHAGE TRAUMATIC                          | Cerebrovascular disease | 1                            |
| Precerebral artery occlusion NOS                         | Cerebrovascular disease | 1                            |
| Subarachnoid haemorrh from intracranial artery, unspecif | Cerebrovascular disease | 1                            |
| Subarachnoid haemorrhage from vertebral artery           | Cerebrovascular disease | 1                            |
| Traumatic subdural haemorrhage                           | Cerebrovascular disease | 1                            |
| CEREBROVASCULAR DISEASE WITH HYPERTENSIO                 | Cerebrovascular disease | 1                            |
| Transient cerebral ischaemia NOS                         | Cerebrovascular disease | 1                            |
| Stenosis of precerebral arteries                         | Cerebrovascular disease | 1                            |
| Evacuation of intracerebral haematoma NEC                | Cerebrovascular disease | 1                            |
| Other cerebrovascular disease OS                         | Cerebrovascular disease | 1                            |
| HAEMORRHAGE INTRACEREBRAL                                | Cerebrovascular disease | 1                            |
| [X]Occlusion and stenosis of other cerebral arteries     | Cerebrovascular disease | 1                            |
| Sequelae/other unspecified cerebrovascular diseases      | Cerebrovascular disease | 1                            |
| MENINGEAL HAEMORRHAGE                                    | Cerebrovascular disease | 1                            |
| Precerebral arterial occlusion                           | Cerebrovascular disease | 1                            |
| Transient cerebral ischaemia NOS                         | Cerebrovascular disease | 1                            |
| Intracerebral haemorrhage NOS                            | Cerebrovascular disease | 1                            |

| Read/OXMIS term                                              | Disease category        | Charlson score weight |
|--------------------------------------------------------------|-------------------------|-----------------------|
| Generalised ischaemic cerebrovascular disease NOS            | Cerebrovascular disease | 1                     |
| CEREBROVASCULAR DISEASE                                      | Cerebrovascular disease | 1                     |
| Other transient cerebral ischaemia                           | Cerebrovascular disease | 1                     |
| Cerebral degeneration due to cerebrovascular disease         | Cerebrovascular disease | 1                     |
| Occlusion??? of multiple and bilat cerebral arteries         | Cerebrovascular disease | 1                     |
| Subarachnoid haemorrhage                                     | Cerebrovascular disease | 1                     |
| [X]Cerebrovascular diseases                                  | Cerebrovascular disease | 1                     |
| HAEMORRHAGE INTRACEREBRAL WITH HYPERTENS                     | Cerebrovascular disease | 1                     |
| CVA - cerebrovascular accid due to intracerebral haemorrhage | Cerebrovascular disease | 1                     |
| Other precerebral artery occlusion                           | Cerebrovascular disease | 1                     |
| Subdural haemorrhage NOS                                     | Cerebrovascular disease | 1                     |
| Open traumatic subarachnoid haemorrhage                      | Cerebrovascular disease | 1                     |
| Other specified cerebrovascular disease                      | Cerebrovascular disease | 1                     |
| Transient cerebral ischaemia                                 | Cerebrovascular disease | 1                     |
| [X]Other specified cerebrovascular diseases                  | Cerebrovascular disease | 1                     |
| Intracerebral haemorrhage, multiple localized                | Cerebrovascular disease | 1                     |
| [X]Occlusion and stenosis of other precerebral arteries      | Cerebrovascular disease | 1                     |
| H/O: cerebrovascular disease                                 | Cerebrovascular disease | 1                     |
| [X]Sequelae/other unspecified cerebrovascular diseases       | Cerebrovascular disease | 1                     |
| Subarachnoid haemorrhage from anterior communicating artery  | Cerebrovascular disease | 1                     |
| Subarachnoid haemorrhage from posterior communicating artery | Cerebrovascular disease | 1                     |
| Sequelae of intracerebral haemorrhage                        | Cerebrovascular disease | 1                     |
| [X]Other intracerebral haemorrhage                           | Cerebrovascular disease | 1                     |
| Subarachnoid haemorrhage from middle cerebral artery         | Cerebrovascular disease | 1                     |
| Other cerebrovascular disease NOS                            | Cerebrovascular disease | 1                     |
| Left sided intracerebral haemorrhage, unspecified            | Cerebrovascular disease | 1                     |
| Intracerebral haemorrhage in hemisphere, unspecified         | Cerebrovascular disease | 1                     |
| Generalised ischaemic cerebrovascular disease NOS            | Cerebrovascular disease | 1                     |

| <b>Read/OXMIS term</b>                                       | <b>Disease category</b> | <b>Charlson score weight</b> |
|--------------------------------------------------------------|-------------------------|------------------------------|
| Cerebral infarction due to embolism of cerebral arteries     | Cerebrovascular disease | 1                            |
| [X]Intracerebral haemorrhage in hemisphere, unspecified      | Cerebrovascular disease | 1                            |
| Intracerebral haemorrhage, intraventricular                  | Cerebrovascular disease | 1                            |
| Sequelae of subarachnoid haemorrhage                         | Cerebrovascular disease | 1                            |
| HAEMORRHAGE INTRACRANIAL                                     | Cerebrovascular disease | 1                            |
| Traumatic subarachnoid haemorrhage                           | Cerebrovascular disease | 1                            |
| Subarachnoid haemorrhage NOS                                 | Cerebrovascular disease | 1                            |
| HAEMORRHAGE SUBARACHNOID TRAUMATIC                           | Cerebrovascular disease | 1                            |
| TRANSIENT CEREBRAL ISCHAEMIA WITH HYPERT                     | Cerebrovascular disease | 1                            |
| Subarachnoid haemorrhage following injury                    | Cerebrovascular disease | 1                            |
| Multiple and bilateral precerebral arterial occlusion        | Cerebrovascular disease | 1                            |
| Stroke due to intracerebral haemorrhage                      | Cerebrovascular disease | 1                            |
| Ruptured berry aneurysm                                      | Cerebrovascular disease | 1                            |
| Subarachnoid haemorrhage from carotid siphon and bifurcation | Cerebrovascular disease | 1                            |
| Intracerebral haemorrhage                                    | Cerebrovascular disease | 1                            |
| Subarachnoid haemorrhage from basilar artery                 | Cerebrovascular disease | 1                            |
| Late effects of cerebrovascular disease                      | Cerebrovascular disease | 1                            |
| [X]Other subarachnoid haemorrhage                            | Cerebrovascular disease | 1                            |
| Closed traumatic subarachnoid haemorrhage                    | Cerebrovascular disease | 1                            |
| SUBARACHNOID HAEMORRHAGE WITH HYPERTENSI                     | Cerebrovascular disease | 1                            |
| [X]Subarachnoid haemorrhage from other intracranial arteries | Cerebrovascular disease | 1                            |
| SUBARACHNOID HAEMORRHAGE                                     | Cerebrovascular disease | 1                            |
| CVA unspecified                                              | Cerebrovascular disease | 1                            |
| Middle cerebral artery syndrome                              | Cerebrovascular disease | 1                            |
| Stroke monitoring                                            | Cerebrovascular disease | 1                            |
| Cerebral palsy, not congenital or infantile, acute           | Cerebrovascular disease | 1                            |
| Anterior cerebral artery syndrome                            | Cerebrovascular disease | 1                            |
| Stroke and cerebrovascular accident unspecified              | Cerebrovascular disease | 1                            |

| <b>Read/OXMIS term</b>                                     | <b>Disease category</b>   | <b>Charlson score weight</b> |
|------------------------------------------------------------|---------------------------|------------------------------|
| Left sided CVA                                             | Cerebrovascular disease   | 1                            |
| CVA - Cerebrovascular accident unspecified                 | Cerebrovascular disease   | 1                            |
| Pure sensory lacunar syndrome                              | Cerebrovascular disease   | 1                            |
| Brain stem stroke syndrome                                 | Cerebrovascular disease   | 1                            |
| Cerebellar stroke syndrome                                 | Cerebrovascular disease   | 1                            |
| Pure motor lacunar syndrome                                | Cerebrovascular disease   | 1                            |
| Right sided CVA                                            | Cerebrovascular disease   | 1                            |
| Stroke unspecified                                         | Cerebrovascular disease   | 1                            |
| H/O: CVA/stroke                                            | Cerebrovascular disease   | 1                            |
| Posterior cerebral artery syndrome                         | Cerebrovascular disease   | 1                            |
| H/O: stroke                                                | Cerebrovascular disease   | 1                            |
| Stroke due to cerebral arterial occlusion                  | Cerebrovascular disease   | 1                            |
| STROKE                                                     | Cerebrovascular disease   | 1                            |
| [X]Hypersensitivity pneumonitis due to other organic dusts | Chronic pulmonary disease | 1                            |
| Pituitary snuff-takers' disease                            | Chronic pulmonary disease | 1                            |
| Flax-dressers' disease                                     | Chronic pulmonary disease | 1                            |
| Severe asthma attack                                       | Chronic pulmonary disease | 1                            |
| Allergic alveolitis and pneumonitis NOS                    | Chronic pulmonary disease | 1                            |
| Panlobular emphysema                                       | Chronic pulmonary disease | 1                            |
| BIRD FANCIER'S LUNG                                        | Chronic pulmonary disease | 1                            |
| ASTHMA ATTACK                                              | Chronic pulmonary disease | 1                            |
| Sequoiosis (red-cedar asthma)                              | Chronic pulmonary disease | 1                            |
| Mild asthma                                                | Chronic pulmonary disease | 1                            |
| Malt workers' lung                                         | Chronic pulmonary disease | 1                            |
| Budgerigar-fanciers' lung                                  | Chronic pulmonary disease | 1                            |
| Other emphysema                                            | Chronic pulmonary disease | 1                            |
| Talc pneumoconiosis                                        | Chronic pulmonary disease | 1                            |
| NOCTURNAL ASTHMA                                           | Chronic pulmonary disease | 1                            |



| <b>Read/OXMIS term</b>                   | <b>Disease category</b>   | <b>Charlson score weight</b> |
|------------------------------------------|---------------------------|------------------------------|
| Asthma                                   | Chronic pulmonary disease | 1                            |
| Bird-fancier's lung                      | Chronic pulmonary disease | 1                            |
| Simple chronic bronchitis                | Chronic pulmonary disease | 1                            |
| Bagassosis                               | Chronic pulmonary disease | 1                            |
| Pollen asthma                            | Chronic pulmonary disease | 1                            |
| ASTHMA ALLERGIC GRASS                    | Chronic pulmonary disease | 1                            |
| EXCISION BRONCHIECTASIS                  | Chronic pulmonary disease | 1                            |
| Chest infection - unspecified bronchitis | Chronic pulmonary disease | 1                            |
| Obstructive chronic bronchitis           | Chronic pulmonary disease | 1                            |
| Severe asthma                            | Chronic pulmonary disease | 1                            |
| Post-infective bronchiectasis            | Chronic pulmonary disease | 1                            |
| ASTHMA                                   | Chronic pulmonary disease | 1                            |
| Asthma causes daytime symptoms most days | Chronic pulmonary disease | 1                            |
| ASTHMA EPISODIC                          | Chronic pulmonary disease | 1                            |
| Other chronic bronchitis NOS             | Chronic pulmonary disease | 1                            |
| Occasional asthma                        | Chronic pulmonary disease | 1                            |
| BYSSINOSIS                               | Chronic pulmonary disease | 1                            |
| Wood asthma                              | Chronic pulmonary disease | 1                            |
| Moderate asthma                          | Chronic pulmonary disease | 1                            |
| Bronchiectasis NOS                       | Chronic pulmonary disease | 1                            |
| Asthma never causes daytime symptoms     | Chronic pulmonary disease | 1                            |
| EMPHYSEMA PULMONARY                      | Chronic pulmonary disease | 1                            |
| Mixed asthma                             | Chronic pulmonary disease | 1                            |
| Asthma disturbs sleep weekly             | Chronic pulmonary disease | 1                            |
| FARMERS' LUNG                            | Chronic pulmonary disease | 1                            |
| Mushroom workers' lung                   | Chronic pulmonary disease | 1                            |
| Simple chronic bronchitis NOS            | Chronic pulmonary disease | 1                            |
| Exercise induced asthma                  | Chronic pulmonary disease | 1                            |

| <b>Read/OXMIS term</b>                                | <b>Disease category</b>   | <b>Charlson score weight</b> |
|-------------------------------------------------------|---------------------------|------------------------------|
| ASTHMA ACUTE                                          | Chronic pulmonary disease | 1                            |
| Asbestosis NOS                                        | Chronic pulmonary disease | 1                            |
| TRACHEOBRONCHITIS                                     | Chronic pulmonary disease | 1                            |
| Asthma causing night waking                           | Chronic pulmonary disease | 1                            |
| Asthma restricts exercise                             | Chronic pulmonary disease | 1                            |
| Silica pneumoconiosis NOS                             | Chronic pulmonary disease | 1                            |
| Chronic pulmonary fibrosis due to chemical fumes      | Chronic pulmonary disease | 1                            |
| Asthma - currently dormant                            | Chronic pulmonary disease | 1                            |
| Asthma causes daytime symptoms 1 to 2 times per month | Chronic pulmonary disease | 1                            |
| Hay fever with asthma                                 | Chronic pulmonary disease | 1                            |
| Extrinsic allergic alveolitis                         | Chronic pulmonary disease | 1                            |
| Asthma monitored                                      | Chronic pulmonary disease | 1                            |
| Status asthmaticus NOS                                | Chronic pulmonary disease | 1                            |
| Chronic obstructive pulmonary disease NOS             | Chronic pulmonary disease | 1                            |
| Asthma unspecified                                    | Chronic pulmonary disease | 1                            |
| Atrophic (senile) emphysema                           | Chronic pulmonary disease | 1                            |
| CHRONIC ASTHMA                                        | Chronic pulmonary disease | 1                            |
| ASTHMA EXACERBATION                                   | Chronic pulmonary disease | 1                            |
| Chronic bullous emphysema                             | Chronic pulmonary disease | 1                            |
| CHRONIC BRONCHITIS WITH EMPHYSEMA                     | Chronic pulmonary disease | 1                            |
| Centrilobular emphysema                               | Chronic pulmonary disease | 1                            |
| Allergic alveolitis and pneumonitis NOS               | Chronic pulmonary disease | 1                            |
| CHRONIC SPASMODIC BRONCHITIS                          | Chronic pulmonary disease | 1                            |
| ASTHMA FREQUENCY REGULARLY                            | Chronic pulmonary disease | 1                            |
| ASTHMA POLLEN INITIATED                               | Chronic pulmonary disease | 1                            |
| Asthma sometimes restricts exercise                   | Chronic pulmonary disease | 1                            |
| Suberosis ( cork-handlers' lung )                     | Chronic pulmonary disease | 1                            |
| Childhood asthma                                      | Chronic pulmonary disease | 1                            |

| <b>Read/OXMIS term</b>                           | <b>Disease category</b>   | <b>Charlson score weight</b> |
|--------------------------------------------------|---------------------------|------------------------------|
| Asthma night-time symptoms                       | Chronic pulmonary disease | 1                            |
| Other emphysema NOS                              | Chronic pulmonary disease | 1                            |
| Asthma never restricts exercise                  | Chronic pulmonary disease | 1                            |
| Silica and silicate pneumoconiosis               | Chronic pulmonary disease | 1                            |
| ASTHMA SEVERITY MILD                             | Chronic pulmonary disease | 1                            |
| Bronchitis and pneumonitis due to chemical fumes | Chronic pulmonary disease | 1                            |
| EXACERBATION OF ASTHMA                           | Chronic pulmonary disease | 1                            |
| INTRINSIC ASTHMA                                 | Chronic pulmonary disease | 1                            |
| ANTHRACOSILICOSIS                                | Chronic pulmonary disease | 1                            |
| Obstructive chronic bronchitis NOS               | Chronic pulmonary disease | 1                            |
| MacLeod's unilateral emphysema                   | Chronic pulmonary disease | 1                            |
| ASTHMA AND BRONCHITIS                            | Chronic pulmonary disease | 1                            |
| ASTHMA FREQUENCY ON EXERCISE ONLY                | Chronic pulmonary disease | 1                            |
| Occupational asthma                              | Chronic pulmonary disease | 1                            |
| Other chronic bronchitis                         | Chronic pulmonary disease | 1                            |
| Allergic bronchitis NEC                          | Chronic pulmonary disease | 1                            |
| PIGEON FANCIER'S LUNG                            | Chronic pulmonary disease | 1                            |
| Pneumoconiosis due to inorganic dust NOS         | Chronic pulmonary disease | 1                            |
| Extrinsic asthma with asthma attack              | Chronic pulmonary disease | 1                            |
| Bronchitis unspecified                           | Chronic pulmonary disease | 1                            |
| Lung disease due to external agents NOS          | Chronic pulmonary disease | 1                            |
| Asbestosis                                       | Chronic pulmonary disease | 1                            |
| Attends asthma monitoring                        | Chronic pulmonary disease | 1                            |
| Pigeon-fanciers' lung                            | Chronic pulmonary disease | 1                            |
| Intrinsic asthma                                 | Chronic pulmonary disease | 1                            |
| Late onset asthma                                | Chronic pulmonary disease | 1                            |
| C/O bronchial catarrh                            | Chronic pulmonary disease | 1                            |
| Chronic bronchitis                               | Chronic pulmonary disease | 1                            |

| <b>Read/OXMIS term</b>                         | <b>Disease category</b>   | <b>Charlson score weight</b> |
|------------------------------------------------|---------------------------|------------------------------|
| BRONCHITIS ACUTE ON CHRONIC                    | Chronic pulmonary disease | 1                            |
| Farmers' lung                                  | Chronic pulmonary disease | 1                            |
| BRONCHITIS PURULENT                            | Chronic pulmonary disease | 1                            |
| Brittle asthma                                 | Chronic pulmonary disease | 1                            |
| Compensatory emphysema                         | Chronic pulmonary disease | 1                            |
| Lung disease with diseases EC NOS              | Chronic pulmonary disease | 1                            |
| BRONCHITIS RECURRENT                           | Chronic pulmonary disease | 1                            |
| Mucopurulent chronic bronchitis                | Chronic pulmonary disease | 1                            |
| Chronic tracheobronchitis                      | Chronic pulmonary disease | 1                            |
| Giant bullous emphysema                        | Chronic pulmonary disease | 1                            |
| Asthma disturbing sleep                        | Chronic pulmonary disease | 1                            |
| Smokers' cough                                 | Chronic pulmonary disease | 1                            |
| Chronic pulmonary fibrosis following radiation | Chronic pulmonary disease | 1                            |
| Asthma confirmed                               | Chronic pulmonary disease | 1                            |
| Chronic emphysema due to chemical fumes        | Chronic pulmonary disease | 1                            |
| Intrinsic asthma without status asthmaticus    | Chronic pulmonary disease | 1                            |
| Late-onset asthma                              | Chronic pulmonary disease | 1                            |
| Recurrent bronchiectasis                       | Chronic pulmonary disease | 1                            |
| Pleural plaque disease due to asbestosis       | Chronic pulmonary disease | 1                            |
| Acute exacerbation of asthma                   | Chronic pulmonary disease | 1                            |
| BRONCHITIS ALLERGIC CHRONIC                    | Chronic pulmonary disease | 1                            |
| BRONCHIAL ASTHMA                               | Chronic pulmonary disease | 1                            |
| Emergency admission, asthma                    | Chronic pulmonary disease | 1                            |
| Coal workers' pneumoconiosis                   | Chronic pulmonary disease | 1                            |
| ASTHMA HIGH RISK                               | Chronic pulmonary disease | 1                            |
| ECZEMA WITH ASTHMA                             | Chronic pulmonary disease | 1                            |
| ASTHMA EXERCISE INDUCED                        | Chronic pulmonary disease | 1                            |
| H/O: asthma                                    | Chronic pulmonary disease | 1                            |

| <b>Read/OXMIS term</b>                                | <b>Disease category</b>   | <b>Charlson score weight</b> |
|-------------------------------------------------------|---------------------------|------------------------------|
| Chronic bullous emphysema NOS                         | Chronic pulmonary disease | 1                            |
| Chronic catarrhal bronchitis                          | Chronic pulmonary disease | 1                            |
| Mixed simple and mucopurulent chronic bronchitis      | Chronic pulmonary disease | 1                            |
| Chronic bronchitis NOS                                | Chronic pulmonary disease | 1                            |
| Intrinsic asthma NOS                                  | Chronic pulmonary disease | 1                            |
| Siderosis                                             | Chronic pulmonary disease | 1                            |
| Bronchiectasis                                        | Chronic pulmonary disease | 1                            |
| Emphysematous bronchitis                              | Chronic pulmonary disease | 1                            |
| Bird-fancier's lung NOS                               | Chronic pulmonary disease | 1                            |
| Intrinsic asthma with status asthmaticus              | Chronic pulmonary disease | 1                            |
| Other allergic alveolitis NOS                         | Chronic pulmonary disease | 1                            |
| Stannosis                                             | Chronic pulmonary disease | 1                            |
| Asthma attack NOS                                     | Chronic pulmonary disease | 1                            |
| Furriers' lung                                        | Chronic pulmonary disease | 1                            |
| BRONCHITIS SUBACUTE                                   | Chronic pulmonary disease | 1                            |
| Asthma attack                                         | Chronic pulmonary disease | 1                            |
| Asthma causes night symptoms 1 to 2 times per month   | Chronic pulmonary disease | 1                            |
| Emphysema NOS                                         | Chronic pulmonary disease | 1                            |
| Extrinsic asthma NOS                                  | Chronic pulmonary disease | 1                            |
| Bronchial asthma                                      | Chronic pulmonary disease | 1                            |
| Acute vesicular emphysema                             | Chronic pulmonary disease | 1                            |
| Asthma daytime symptoms                               | Chronic pulmonary disease | 1                            |
| Obliterative bronchiolitis due to chemical fumes      | Chronic pulmonary disease | 1                            |
| [X]Pneumoconiosis due to other dust containing silica | Chronic pulmonary disease | 1                            |
| STATUS ASTHMATICUS                                    | Chronic pulmonary disease | 1                            |
| Hay fever with asthma                                 | Chronic pulmonary disease | 1                            |
| Pneumoconiosis due to other inorganic dust            | Chronic pulmonary disease | 1                            |
| ASTHMA EXERCISE INCLUDED                              | Chronic pulmonary disease | 1                            |

| <b>Read/OXMIS term</b>                                   | <b>Disease category</b>   | <b>Charlson score weight</b> |
|----------------------------------------------------------|---------------------------|------------------------------|
| ASTHMA SEVERITY MODERATE                                 | Chronic pulmonary disease | 1                            |
| Massive silicotic fibrosis                               | Chronic pulmonary disease | 1                            |
| BRONCHIECTASIS                                           | Chronic pulmonary disease | 1                            |
| Bronchitis and pneumonitis due to chemical fumes NOS     | Chronic pulmonary disease | 1                            |
| Extrinsic asthma without status asthmaticus              | Chronic pulmonary disease | 1                            |
| CHRONIC BRONCHITIS                                       | Chronic pulmonary disease | 1                            |
| Hypersensitivity pneumonitis NOS                         | Chronic pulmonary disease | 1                            |
| BRONCHITIS OBSTRUCTIVE                                   | Chronic pulmonary disease | 1                            |
| Asthma causes daytime symptoms 1 to 2 times per week     | Chronic pulmonary disease | 1                            |
| ASTHMA OCCASIONAL                                        | Chronic pulmonary disease | 1                            |
| Asthma limiting activities                               | Chronic pulmonary disease | 1                            |
| Lung disease with diseases EC                            | Chronic pulmonary disease | 1                            |
| OBSTRUCTIVE LUNG DISEASE COMPENSATORY                    | Chronic pulmonary disease | 1                            |
| Purulent chronic bronchitis                              | Chronic pulmonary disease | 1                            |
| Interstitial emphysema                                   | Chronic pulmonary disease | 1                            |
| OBSTRUCTIVE LUNG DISEASE                                 | Chronic pulmonary disease | 1                            |
| Pneumoconiosis NOS                                       | Chronic pulmonary disease | 1                            |
| Mucopurulent chronic bronchitis NOS                      | Chronic pulmonary disease | 1                            |
| Subcutaneous emphysema                                   | Chronic pulmonary disease | 1                            |
| WHEEZING BRONCHIAL                                       | Chronic pulmonary disease | 1                            |
| [X]Pneumoconiosis due to other specified inorganic dusts | Chronic pulmonary disease | 1                            |
| Tracheobronchitis NOS                                    | Chronic pulmonary disease | 1                            |
| Asthma limits walking up hills or stairs                 | Chronic pulmonary disease | 1                            |
| Byssinosis                                               | Chronic pulmonary disease | 1                            |
| Maple bark strippers' lung                               | Chronic pulmonary disease | 1                            |
| Bronchitis NOS                                           | Chronic pulmonary disease | 1                            |
| Asthma treatment compliance unsatisfactory               | Chronic pulmonary disease | 1                            |
| Aspirin induced asthma                                   | Chronic pulmonary disease | 1                            |

| <b>Read/OXMIS term</b>                                      | <b>Disease category</b>   | <b>Charlson score weight</b> |
|-------------------------------------------------------------|---------------------------|------------------------------|
| Absent from work or school due to asthma                    | Chronic pulmonary disease | 1                            |
| Berylliosis                                                 | Chronic pulmonary disease | 1                            |
| Emphysema                                                   | Chronic pulmonary disease | 1                            |
| Chronic asthmatic bronchitis                                | Chronic pulmonary disease | 1                            |
| Asthma prophylactic medication used                         | Chronic pulmonary disease | 1                            |
| BRONCHITIS                                                  | Chronic pulmonary disease | 1                            |
| Segmental bullous emphysema                                 | Chronic pulmonary disease | 1                            |
| Asthma severely restricts exercise                          | Chronic pulmonary disease | 1                            |
| Chronic wheezy bronchitis                                   | Chronic pulmonary disease | 1                            |
| Cannabinosis                                                | Chronic pulmonary disease | 1                            |
| Fetid chronic bronchitis                                    | Chronic pulmonary disease | 1                            |
| Allergic asthma NEC                                         | Chronic pulmonary disease | 1                            |
| LATE ONSET ASTHMA                                           | Chronic pulmonary disease | 1                            |
| BRONCHITIS ALLERGIC                                         | Chronic pulmonary disease | 1                            |
| Aluminosis of lung                                          | Chronic pulmonary disease | 1                            |
| ASBESTOSIS                                                  | Chronic pulmonary disease | 1                            |
| Intrinsic asthma with asthma attack                         | Chronic pulmonary disease | 1                            |
| Bauxite fibrosis of lung                                    | Chronic pulmonary disease | 1                            |
| [X]Other emphysema                                          | Chronic pulmonary disease | 1                            |
| Detergent asthma                                            | Chronic pulmonary disease | 1                            |
| Other allergic alveolitis                                   | Chronic pulmonary disease | 1                            |
| Extrinsic (atopic) asthma                                   | Chronic pulmonary disease | 1                            |
| Exercise induced asthma                                     | Chronic pulmonary disease | 1                            |
| CARDIAC ASTHMA                                              | Congestive heart disease  | 1                            |
| Cardiac failure NOS                                         | Congestive heart disease  | 1                            |
| Decompensated cardiac failure                               | Congestive heart disease  | 1                            |
| Hypertensive heart&renal dis wth (congestive) heart failure | Congestive heart disease  | 1                            |
| HEART FAILURE LEFT-SIDED                                    | Congestive heart disease  | 1                            |

| <b>Read/OXMIS term</b>                         | <b>Disease category</b>  | <b>Charlson score weight</b> |
|------------------------------------------------|--------------------------|------------------------------|
| LVF (LEFT VENTRICULAR FAILURE)                 | Congestive heart disease | 1                            |
| Weak heart                                     | Congestive heart disease | 1                            |
| Heart failure annual review                    | Congestive heart disease | 1                            |
| MYOCARDIAL FAILURE                             | Congestive heart disease | 1                            |
| Congestive cardiomyopathy                      | Congestive heart disease | 1                            |
| Compensated cardiac failure                    | Congestive heart disease | 1                            |
| Right heart failure                            | Congestive heart disease | 1                            |
| Cardiac failure therapy                        | Congestive heart disease | 1                            |
| CONGESTIVE CARDIAC FAILURE                     | Congestive heart disease | 1                            |
| Congestive cardiac failure                     | Congestive heart disease | 1                            |
| Acute heart failure                            | Congestive heart disease | 1                            |
| H/O: Heart failure in last year                | Congestive heart disease | 1                            |
| Acute left ventricular failure                 | Congestive heart disease | 1                            |
| Heart failure as a complication of care        | Congestive heart disease | 1                            |
| Chronic congestive heart failure               | Congestive heart disease | 1                            |
| Heart failure care plan discussed with patient | Congestive heart disease | 1                            |
| CONGESTIVE CARDIOMYOPATHY                      | Congestive heart disease | 1                            |
| LEFT VENTRICULAR FAILURE ACUTE                 | Congestive heart disease | 1                            |
| Left ventricular failure                       | Congestive heart disease | 1                            |
| CONGESTIVE HEART FAILURE                       | Congestive heart disease | 1                            |
| Heart failure                                  | Congestive heart disease | 1                            |
| HEART FAILURE ACUTE                            | Congestive heart disease | 1                            |
| Congestive heart failure                       | Congestive heart disease | 1                            |
| H/O: heart failure                             | Congestive heart disease | 1                            |
| WEAK HEART                                     | Congestive heart disease | 1                            |
| Cardiac failure                                | Congestive heart disease | 1                            |
| Heart failure confirmed                        | Congestive heart disease | 1                            |
| HYPERTENSION CONGESTIVE HEART FAILURE          | Congestive heart disease | 1                            |



| Read/OXMIS term                                             | Disease category         | Charlson score weight |
|-------------------------------------------------------------|--------------------------|-----------------------|
| Acute congestive heart failure                              | Congestive heart disease | 1                     |
| HEART FAILURE RIGHT-SIDED                                   | Congestive heart disease | 1                     |
| Admit heart failure emergency                               | Congestive heart disease | 1                     |
| CONGESTIVE HEART FAILURE COMPENSATED                        | Congestive heart disease | 1                     |
| Heart failure NOS                                           | Congestive heart disease | 1                     |
| CONGESTIVE HEART FAILURE DECOMPENSATED                      | Congestive heart disease | 1                     |
| HEART FAILURE                                               | Congestive heart disease | 1                     |
| DEMENTIA                                                    | Dementia                 | 1                     |
| Presenile dementia NOS                                      | Dementia                 | 1                     |
| Arteriosclerotic dementia with paranoia                     | Dementia                 | 1                     |
| [X]Alzheimer's dementia unspec                              | Dementia                 | 1                     |
| Uncomplicated presenile dementia                            | Dementia                 | 1                     |
| DEMENTIA ARTERIOSCLEROTIC                                   | Dementia                 | 1                     |
| [X]Vascular dementia, unspecified                           | Dementia                 | 1                     |
| [X]Lewy body dementia                                       | Dementia                 | 1                     |
| [X]Senile dementia,Alzheimer's type                         | Dementia                 | 1                     |
| Multi infarct dementia                                      | Dementia                 | 1                     |
| [X] Senile dementia NOS                                     | Dementia                 | 1                     |
| Dementia in conditions EC                                   | Dementia                 | 1                     |
| [X]Predominantly cortical dementia                          | Dementia                 | 1                     |
| [X] Senile dementia, depressed or paranoid type             | Dementia                 | 1                     |
| [X]Dementia in Alzheimer's disease                          | Dementia                 | 1                     |
| SENILE DETERIORATION                                        | Dementia                 | 1                     |
| [X] Unspecified dementia                                    | Dementia                 | 1                     |
| [X]Presenile dementia,Alzheimer's type                      | Dementia                 | 1                     |
| Arteriosclerotic dementia                                   | Dementia                 | 1                     |
| [X]Dementia in other diseases classified elsewhere          | Dementia                 | 1                     |
| [X]Vascular dementia of acute onset                         | Dementia                 | 1                     |
| [X]Multi-infarct dementia                                   | Dementia                 | 1                     |
| DEMENTIA AGGRESSIVE                                         | Dementia                 | 1                     |
| Uncomplicated senile dementia                               | Dementia                 | 1                     |
| Arteriosclerotic dementia NOS                               | Dementia                 | 1                     |
| [X]Dementia in other specified diseases classif elsewhere   | Dementia                 | 1                     |
| Presenile dementia                                          | Dementia                 | 1                     |
| [X]Dementia in Alzheimer's disease, unspecified             | Dementia                 | 1                     |
| [X]Other vascular dementia                                  | Dementia                 | 1                     |
| [X]Arteriosclerotic dementia                                | Dementia                 | 1                     |
| [X]Primary degen dementia of Alzheimer's type, senile onset | Dementia                 | 1                     |
| Uncomplicated arteriosclerotic dementia                     | Dementia                 | 1                     |
| Senile/presenile dementia                                   | Dementia                 | 1                     |

| <b>Read/OXMIS term</b>                                       | <b>Disease category</b> | <b>Charlson score weight</b> |
|--------------------------------------------------------------|-------------------------|------------------------------|
| [X]Dementia in Alzheimer's dis, atypical or mixed type       | Dementia                | 1                            |
| Senile dementia                                              | Dementia                | 1                            |
| Arteriosclerotic dementia with depression                    | Dementia                | 1                            |
| Arteriosclerotic dementia with delirium                      | Dementia                | 1                            |
| SENILE DEMENTIA                                              | Dementia                | 1                            |
| [X]Dementia in Alzheimer's disease with late onset           | Dementia                | 1                            |
| [X]Vascular dementia                                         | Dementia                | 1                            |
| PRESENILE DEMENTIA                                           | Dementia                | 1                            |
| [X] Primary degenerative dementia NOS                        | Dementia                | 1                            |
| H/O: dementia                                                | Dementia                | 1                            |
| [X]Subcortical vascular dementia                             | Dementia                | 1                            |
| Uncomplicated senile dementia                                | Dementia                | 1                            |
| [X]Primary degen dementia, Alzheimer's type, presenile onset | Dementia                | 1                            |
| [X]Dementia in Alzheimer's disease with early onset          | Dementia                | 1                            |
| [X]Mixed cortical and subcortical vascular dementia          | Dementia                | 1                            |
| Unstable diabetes                                            | Diabetes                | 1                            |
| Insulin dependent diabetes mellitus with gangrene            | Diabetes                | 1                            |
| Diabetes mellitus, adult onset, with ketoacidosis            | Diabetes                | 1                            |
| Lipoatrophic diabetes mellitus                               | Diabetes                | 1                            |
| Diabetes mellitus, juvenile type, with ketoacidotic coma     | Diabetes                | 1                            |
| Non-insulin dependent diabetes mellitus with gangrene        | Diabetes                | 1                            |
| Non-insulin-dependent diabetes mellitus without complication | Diabetes                | 1                            |
| Type 2 diabetes mellitus with ulcer                          | Diabetes                | 1                            |
| Type 2 diabetes mellitus with arthropathy                    | Diabetes                | 1                            |
| NIDDM - Non-insulin dependent diabetes mellitus              | Diabetes                | 1                            |
| Type II diabetes mellitus with arthropathy                   | Diabetes                | 1                            |
| Diabetes mellitus with unspecified complication              | Diabetes                | 1                            |
| Type I diabetes mellitus with ketoacidosis                   | Diabetes                | 1                            |
| Diabetes mellitus, adult with gangrene                       | Diabetes                | 1                            |
| GANGRENE DIABETIC                                            | Diabetes                | 1                            |
| Insulin treated Type 2 diabetes mellitus                     | Diabetes                | 1                            |
| Type I diabetes mellitus maturity onset                      | Diabetes                | 1                            |
| Diabetes mellitus NOS with hyperosmolar coma                 | Diabetes                | 1                            |
| HYPOGLYCAEMIC COMA DIABETIC                                  | Diabetes                | 1                            |
| MATURITY ONSET DIABETES MELLITUS INSULIN                     | Diabetes                | 1                            |
| Diabetic peripheral angiopathy                               | Diabetes                | 1                            |
| HYPOGLYCAEMIA IN DIABETES MELLITUS                           | Diabetes                | 1                            |
| Diabetic - poor control                                      | Diabetes                | 1                            |
| Insulin treated Type II diabetes mellitus                    | Diabetes                | 1                            |
| Type 2 diabetes mellitus with peripheral angiopathy          | Diabetes                | 1                            |
| Non-insulin-dependent diabetes mellitus with multiple comps  | Diabetes                | 1                            |
| Unstable insulin dependent diabetes mellitus                 | Diabetes                | 1                            |

| <b>Read/OXMIS term</b>                                     | <b>Disease category</b> | <b>Charlson score weight</b> |
|------------------------------------------------------------|-------------------------|------------------------------|
| Type 2 diabetes mellitus without complication              | Diabetes                | 1                            |
| Diabetes mellitus with other specified manifestation       | Diabetes                | 1                            |
| Type II diabetes mellitus                                  | Diabetes                | 1                            |
| Type 2 diabetes mellitus with persistent proteinuria       | Diabetes                | 1                            |
| UNSTABLE DIABETIC                                          | Diabetes                | 1                            |
| Non-insulin dependent diabetes mellitus with arthropathy   | Diabetes                | 1                            |
| Type 2 diabetes mellitus with arthropathy                  | Diabetes                | 1                            |
| Diabetic on insulin                                        | Diabetes                | 1                            |
| Type II diabetes mellitus with gangrene                    | Diabetes                | 1                            |
| Pre-existing diabetes mellitus, non-insulin-dependent      | Diabetes                | 1                            |
| PRURITUS DIABETIC                                          | Diabetes                | 1                            |
| Type 2 diabetes mellitus with ketoacidosis                 | Diabetes                | 1                            |
| Unstable type 1 diabetes mellitus                          | Diabetes                | 1                            |
| Other specified diabetes mellitus with unspecified comps   | Diabetes                | 1                            |
| Diabetes mellitus autosomal dominant type 2                | Diabetes                | 1                            |
| Diabetes mellitus NOS with peripheral circulatory disorder | Diabetes                | 1                            |
| Type 1 diabetes mellitus with ketoacidotic coma            | Diabetes                | 1                            |
| DIABETIC CATARACT                                          | Diabetes                | 1                            |
| Diabetes mellitus, juvenile type, with ketoacidosis        | Diabetes                | 1                            |
| Insulin dependent diabetes mellitus                        | Diabetes                | 1                            |
| DIABETIC ACIDOSIS                                          | Diabetes                | 1                            |
| Unstable type I diabetes mellitus                          | Diabetes                | 1                            |
| SUGAR DIABETES                                             | Diabetes                | 1                            |
| Diabetes mellitus with ketoacidotic coma                   | Diabetes                | 1                            |
| Diabetes mellitus with gangrene                            | Diabetes                | 1                            |
| KETOSIS DIABETIC                                           | Diabetes                | 1                            |
| DIABETES                                                   | Diabetes                | 1                            |
| Type 1 diabetes mellitus with ulcer                        | Diabetes                | 1                            |
| Non-insulin dependent diabetes mellitus with ulcer         | Diabetes                | 1                            |
| Other specified diabetes mellitus with other spec comps    | Diabetes                | 1                            |
| ABSCESS DIABETIC                                           | Diabetes                | 1                            |
| Type II diabetes mellitus - poor control                   | Diabetes                | 1                            |
| Malnutrition-related diabetes mellitus with coma           | Diabetes                | 1                            |
| Type 2 diabetes mellitus                                   | Diabetes                | 1                            |
| Insulin treated non-insulin dependent diabetes mellitus    | Diabetes                | 1                            |
| Diabetic stabilisation                                     | Diabetes                | 1                            |
| Insulin dependent diabetes mellitus                        | Diabetes                | 1                            |
| Type 1 diabetes mellitus with peripheral angiopathy        | Diabetes                | 1                            |
| Type 1 diabetes mellitus with hypoglycaemic coma           | Diabetes                | 1                            |
| Type I diabetes mellitus                                   | Diabetes                | 1                            |
| Diabetes mellitus, adult, peripheral circulatory disorder  | Diabetes                | 1                            |
| Malnutrition-related diabetes mellitus with ketoacidosis   | Diabetes                | 1                            |

| Read/OXMIS term                                             | Disease category | Charlson score weight |
|-------------------------------------------------------------|------------------|-----------------------|
| Diabetes mellitus, juvenile type, with hyperosmolar coma    | Diabetes         | 1                     |
| DIABETIC AMYOTROPHY                                         | Diabetes         | 1                     |
| Type II diabetes mellitus with ulcer                        | Diabetes         | 1                     |
| Type 2 diabetes mellitus with gangrene                      | Diabetes         | 1                     |
| KETOACIDOSIS DIABETIC                                       | Diabetes         | 1                     |
| Diabetes mellitus, adult onset, with hyperosmolar coma      | Diabetes         | 1                     |
| Type I diabetes mellitus with hypoglycaemic coma            | Diabetes         | 1                     |
| Hyperosmolar non-ketotic state in type 2 diabetes mellitus  | Diabetes         | 1                     |
| ULCER DIABETIC                                              | Diabetes         | 1                     |
| Diabetic - poor control NOS                                 | Diabetes         | 1                     |
| Insulin treated Type II diabetes mellitus                   | Diabetes         | 1                     |
| Insulin dependent diabetes mellitus with ulcer              | Diabetes         | 1                     |
| Insulin treated Type 2 diabetes mellitus                    | Diabetes         | 1                     |
| Type 1 diabetes mellitus - poor control                     | Diabetes         | 1                     |
| Type 1 diabetes mellitus - poor control                     | Diabetes         | 1                     |
| NIDDM with peripheral circulatory disorder                  | Diabetes         | 1                     |
| Secondary pancreatic diabetes mellitus                      | Diabetes         | 1                     |
| Type 1 diabetes mellitus with ketoacidosis                  | Diabetes         | 1                     |
| Diabetic on insulin and oral treatment                      | Diabetes         | 1                     |
| Pre-existing diabetes mellitus, insulin-dependent           | Diabetes         | 1                     |
| Type 2 diabetes mellitus with ketoacidotic coma             | Diabetes         | 1                     |
| Diabetes mellitus with no mention of complication           | Diabetes         | 1                     |
| Type 1 diabetes mellitus with gangrene                      | Diabetes         | 1                     |
| Type 2 diabetes mellitus with hypoglycaemic coma            | Diabetes         | 1                     |
| Type 2 diabetes mellitus with peripheral angiopathy         | Diabetes         | 1                     |
| Type 1 diabetes mellitus                                    | Diabetes         | 1                     |
| Non-insulin-dependent diabetes mellitus                     | Diabetes         | 1                     |
| Non-insulin dependent diabetes mellitus with hypoglyca coma | Diabetes         | 1                     |
| Diabetes mellitus NOS with unspecified complication         | Diabetes         | 1                     |
| Type 1 diabetes mellitus with hypoglycaemic coma            | Diabetes         | 1                     |
| Diabetic annual review                                      | Diabetes         | 1                     |
| Diabetes mellitus, juvenile ??? circulatory disorder        | Diabetes         | 1                     |
| Unstable insulin dependent diabetes mellitus                | Diabetes         | 1                     |
| Type 1 diabetes mellitus maturity onset                     | Diabetes         | 1                     |
| Other specified diabetes mellitus with ketoacidosis         | Diabetes         | 1                     |
| Type II diabetes mellitus with persistent proteinuria       | Diabetes         | 1                     |
| DIABETIC DIARRHOEA                                          | Diabetes         | 1                     |
| HYPEROSMOLAR DIABETIC STATE                                 | Diabetes         | 1                     |
| DIETARY CONTROL DIABETES                                    | Diabetes         | 1                     |
| Type 2 diabetes mellitus - poor control                     | Diabetes         | 1                     |
| [X]Diabetes mellitus                                        | Diabetes         | 1                     |
| Diabetes mellitus                                           | Diabetes         | 1                     |
| Type 1 diabetes mellitus without complication               | Diabetes         | 1                     |

| <b>Read/OXMIS term</b>                                      | <b>Disease category</b> | <b>Charlson score weight</b> |
|-------------------------------------------------------------|-------------------------|------------------------------|
| Diabetes mellitus NOS with no mention of complication       | Diabetes                | 1                            |
| Diabetes mellitus NOS with ketoacidotic coma                | Diabetes                | 1                            |
| Insulin dependent diab mell with peripheral angiopathy      | Diabetes                | 1                            |
| Insulin dependent diabetes mellitus with hypoglycaemic coma | Diabetes                | 1                            |
| Diabetes mellitus with ketoacidosis                         | Diabetes                | 1                            |
| Insulin dependent diabetes mellitus - poor control          | Diabetes                | 1                            |
| Type 2 diabetes mellitus - poor control                     | Diabetes                | 1                            |
| Diabetic - cooperative patient                              | Diabetes                | 1                            |
| Steroid induced diabetes mellitus without complication      | Diabetes                | 1                            |
| Maturity onset diabetes                                     | Diabetes                | 1                            |
| Type 1 diabetes mellitus                                    | Diabetes                | 1                            |
| Admit diabetic emergency                                    | Diabetes                | 1                            |
| LATENT DIABETES                                             | Diabetes                | 1                            |
| H/O: diabetes mellitus                                      | Diabetes                | 1                            |
| Type I diabetes mellitus - poor control                     | Diabetes                | 1                            |
| Insulin dependent diabetes mellitus                         | Diabetes                | 1                            |
| Diabetes mellitus, adult onset, no mention of complication  | Diabetes                | 1                            |
| Type 2 diabetes mellitus with ulcer                         | Diabetes                | 1                            |
| Diabetes mellitus, adult onset, unspecified complication    | Diabetes                | 1                            |
| Pre-existing diabetes mellitus, unspecified                 | Diabetes                | 1                            |
| Patient on maximal tolerated therapy for diabetes           | Diabetes                | 1                            |
| Diabetes mellitus NOS with other specified manifestation    | Diabetes                | 1                            |
| Diabetes mellitus with hyperosmolar coma                    | Diabetes                | 1                            |
| Malnutrition-related diabetes mellitus                      | Diabetes                | 1                            |
| IDDM-Insulin dependent diabetes mellitus                    | Diabetes                | 1                            |
| Diabetes mellitus NOS with ketoacidosis                     | Diabetes                | 1                            |
| Type 2 diabetes mellitus with hypoglycaemic coma            | Diabetes                | 1                            |
| Insulin dependent diabetes mellitus - poor control          | Diabetes                | 1                            |
| PRECOMA DIABETIC                                            | Diabetes                | 1                            |
| Type 1 diabetes mellitus with persistent proteinuria        | Diabetes                | 1                            |
| DIABETES MELLITUS INSULIN DEPENDANT                         | Diabetes                | 1                            |
| Diabetes mellitus induced by non-steroid drugs              | Diabetes                | 1                            |
| Diabetes mellitus with peripheral circulatory disorder      | Diabetes                | 1                            |
| Maturity onset diabetes in youth type 2                     | Diabetes                | 1                            |
| IDDM with peripheral circulatory disorder                   | Diabetes                | 1                            |
| Type II diabetes mellitus with peripheral angiopathy        | Diabetes                | 1                            |
| Type II diabetes mellitus with hypoglycaemic coma           | Diabetes                | 1                            |
| Type 1 diabetes mellitus with persistent microalbuminuria   | Diabetes                | 1                            |
| Non-insulin dependent diabetes mellitus                     | Diabetes                | 1                            |
| Type 2 diabetes mellitus with persistent microalbuminuria   | Diabetes                | 1                            |
| [X]Other specified diabetes mellitus                        | Diabetes                | 1                            |

| <b>Read/OXMIS term</b>                                       | <b>Disease category</b>     | <b>Charlson score weight</b> |
|--------------------------------------------------------------|-----------------------------|------------------------------|
| Type 2 diabetes mellitus                                     | Diabetes                    | 1                            |
| Other specified diabetes mellitus with coma                  | Diabetes                    | 1                            |
| Type II diabetes mellitus                                    | Diabetes                    | 1                            |
| Type I diabetes mellitus with ulcer                          | Diabetes                    | 1                            |
| Type I diabetes mellitus with ketoacidotic coma              | Diabetes                    | 1                            |
| Non-insulin dependant diabetes mellitus - poor control       | Diabetes                    | 1                            |
| COMA DIABETIC                                                | Diabetes                    | 1                            |
| Diabetes mellitus, adult, other specified manifestation      | Diabetes                    | 1                            |
| Type I diabetes mellitus                                     | Diabetes                    | 1                            |
| Secondary diabetes mellitus                                  | Diabetes                    | 1                            |
| Type II diabetes mellitus - poor control                     | Diabetes                    | 1                            |
| Diabetic - good control                                      | Diabetes                    | 1                            |
| Diabetes mellitus, juvenile type, no mention of complication | Diabetes                    | 1                            |
| Diabetic cataract                                            | Diabetes with complications | 2                            |
| Type 2 diabetes mellitus with neurological complications     | Diabetes with complications | 2                            |
| Diabetes mellitus, juvenile type, with renal manifestation   | Diabetes with complications | 2                            |
| Type II diabetes mellitus with ophthalmic complications      | Diabetes with complications | 2                            |
| O/E - right eye background diabetic retinopathy              | Diabetes with complications | 2                            |
| Type I diabetes mellitus with polyneuropathy                 | Diabetes with complications | 2                            |
| Insulin dependent diabetes mellitus with arthropathy         | Diabetes with complications | 2                            |
| Non-insulin dependent diabetes mellitus with nephropathy     | Diabetes with complications | 2                            |
| Insulin dependent diabetes mellitus with mononeuropathy      | Diabetes with complications | 2                            |
| Diabetes mellitus, adult onset, neurological manifestation   | Diabetes with complications | 2                            |
| Insulin-dependent diabetes mellitus with renal complications | Diabetes with complications | 2                            |
| Non-insulin dependent d m with neuropathic arthropathy       | Diabetes with complications | 2                            |
| Insulin-dependent diabetes mellitus with neurological comps  | Diabetes with complications | 2                            |
| Type 2 diabetes mellitus with ophthalmic complications       | Diabetes with complications | 2                            |
| O/E - left eye background diabetic retinopathy               | Diabetes with complications | 2                            |
| Type II diabetes mellitus with renal complications           | Diabetes with complications | 2                            |
| Preproliferative diabetic retinopathy                        | Diabetes with complications | 2                            |
| Diabetes mellitus, juvenile type, ophthalmic manifestation   | Diabetes with complications | 2                            |
| Type 2 diabetes mellitus with gastroparesis                  | Diabetes with complications | 2                            |
| Non-insulin-dependent diabetes mellitus with ophthalm comps  | Diabetes with complications | 2                            |

| <b>Read/OXMIS term</b>                                       | <b>Disease category</b>     | <b>Charlson score weight</b> |
|--------------------------------------------------------------|-----------------------------|------------------------------|
| NEUROPATHY DIABETIC                                          | Diabetes with complications | 2                            |
| Type 2 diabetes mellitus with diabetic cataract              | Diabetes with complications | 2                            |
| Type 1 diabetes mellitus with retinopathy                    | Diabetes with complications | 2                            |
| Diabetes mellitus with polyneuropathy                        | Diabetes with complications | 2                            |
| Diabetic retinopathy                                         | Diabetes with complications | 2                            |
| Type 2 diabetes mellitus with retinopathy                    | Diabetes with complications | 2                            |
| Non-insulin dependent diabetes mellitus with polyneuropathy  | Diabetes with complications | 2                            |
| Non proliferative diabetic retinopathy                       | Diabetes with complications | 2                            |
| Other specified diabetes mellitus with ophthalmic complicatn | Diabetes with complications | 2                            |
| Type II diabetes mellitus with diabetic cataract             | Diabetes with complications | 2                            |
| Type 2 diabetes mellitus with polyneuropathy                 | Diabetes with complications | 2                            |
| Type 2 diabetes mellitus with mononeuropathy                 | Diabetes with complications | 2                            |
| Type II diabetes mellitus with retinopathy                   | Diabetes with complications | 2                            |
| Type 1 diabetes mellitus with neurological complications     | Diabetes with complications | 2                            |
| Type I diabetes mellitus with mononeuropathy                 | Diabetes with complications | 2                            |
| Non-insulin-dependent diabetes mellitus with retinopathy     | Diabetes with complications | 2                            |
| Myasthenic syndrome due to diabetic amyotrophy               | Diabetes with complications | 2                            |
| Diabetes mellitus NOS with neurological manifestation        | Diabetes with complications | 2                            |
| Other specified diabetes mellitus with renal complications   | Diabetes with complications | 2                            |
| O/E - left eye proliferative diabetic retinopathy            | Diabetes with complications | 2                            |
| Type I diabetes mellitus with retinopathy                    | Diabetes with complications | 2                            |
| Diabetic maculopathy                                         | Diabetes with complications | 2                            |
| DIABETIC GLOMERULOSCLEROSIS                                  | Diabetes with complications | 2                            |
| Type 2 diabetes mellitus with nephropathy                    | Diabetes with complications | 2                            |
| Diabetic amyotrophy                                          | Diabetes with complications | 2                            |
| Kimmelstiel - Wilson disease                                 | Diabetes with complications | 2                            |
| Insulin dependent diabetes mellitus with nephropathy         | Diabetes with complications | 2                            |
| Type 1 diabetes mellitus with neurological complications     | Diabetes with complications | 2                            |

| <b>Read/OXMIS term</b>                                    | <b>Disease category</b>     | <b>Charlson score weight</b> |
|-----------------------------------------------------------|-----------------------------|------------------------------|
| Insulin-dependent diabetes mellitus with ophthalmic comps | Diabetes with complications | 2                            |
| Diabetic mononeuropathy                                   | Diabetes with complications | 2                            |
| Diabetic neuropathy                                       | Diabetes with complications | 2                            |
| Advanced diabetic maculopathy                             | Diabetes with complications | 2                            |
| Type II diabetes mellitus with renal complications        | Diabetes with complications | 2                            |
| O/E - left eye stable treated prolif diabetic retinopathy | Diabetes with complications | 2                            |
| Type 2 diabetes mellitus with nephropathy                 | Diabetes with complications | 2                            |
| Type 1 diabetes mellitus with diabetic cataract           | Diabetes with complications | 2                            |
| Type 2 diabetes mellitus with diabetic cataract           | Diabetes with complications | 2                            |
| Type I diabetes mellitus with nephropathy                 | Diabetes with complications | 2                            |
| Type II diabetes mellitus with polyneuropathy             | Diabetes with complications | 2                            |
| Type 2 diabetes mellitus with neurological complications  | Diabetes with complications | 2                            |
| Type 1 diabetes mellitus with mononeuropathy              | Diabetes with complications | 2                            |
| Type 2 diabetes mellitus with neuropathic arthropathy     | Diabetes with complications | 2                            |
| High risk non proliferative diabetic retinopathy          | Diabetes with complications | 2                            |
| Insulin dependent diabetes mellitus with retinopathy      | Diabetes with complications | 2                            |
| Type 1 diabetes mellitus with polyneuropathy              | Diabetes with complications | 2                            |
| CHARCOT'S DIABETIC ARTHROPATHY                            | Diabetes with complications | 2                            |
| Polyneuropathy in disease NOS                             | Diabetes with complications | 2                            |
| Type 2 diabetes mellitus with ophthalmic complications    | Diabetes with complications | 2                            |
| DIABETIC NEPHROPATHY                                      | Diabetes with complications | 2                            |
| O/E - diabetic maculopathy present both eyes              | Diabetes with complications | 2                            |
| Type 2 diabetes mellitus with renal complications         | Diabetes with complications | 2                            |
| Non-insulin-dependent diabetes mellitus with renal comps  | Diabetes with complications | 2                            |
| Non-insulin-dependent diabetes mellitus with neuro comps  | Diabetes with complications | 2                            |
| High risk proliferative diabetic retinopathy              | Diabetes with complications | 2                            |
| Diabetes mellitus with neuropathy                         | Diabetes with complications | 2                            |
| O/E - left eye preproliferative diabetic retinopathy      | Diabetes with complications | 2                            |



| <b>Read/OXMIS term</b>                                            | <b>Disease category</b>     | <b>Charlson score weight</b> |
|-------------------------------------------------------------------|-----------------------------|------------------------------|
| Non-insulin depend diabetes mellitus with diabetic cataract       | Diabetes with complications | 2                            |
| Type 2 diabetes mellitus with retinopathy                         | Diabetes with complications | 2                            |
| Insulin dependent diabetes mellitus with polyneuropathy           | Diabetes with complications | 2                            |
| Type I diabetes mellitus with neurological complications          | Diabetes with complications | 2                            |
| Type 1 diabetes mellitus with renal complications                 | Diabetes with complications | 2                            |
| Type II diabetes mellitus with neuropathic arthropathy            | Diabetes with complications | 2                            |
| Diabetes mellitus with neurological manifestation                 | Diabetes with complications | 2                            |
| Type II diabetes mellitus with retinopathy                        | Diabetes with complications | 2                            |
| Diabetic polyneuropathy                                           | Diabetes with complications | 2                            |
| O/E - right eye stable treated proliferative diabetic retinopathy | Diabetes with complications | 2                            |
| Diabetic retinopathy NOS                                          | Diabetes with complications | 2                            |
| Diabetes mellitus NOS with ophthalmic manifestation               | Diabetes with complications | 2                            |
| Diabetes mellitus, adult onset, ophthalmic manifestation          | Diabetes with complications | 2                            |
| Type 1 diabetes mellitus with nephropathy                         | Diabetes with complications | 2                            |
| Type I diabetes mellitus with diabetic cataract                   | Diabetes with complications | 2                            |
| Type I diabetes mellitus with renal complications                 | Diabetes with complications | 2                            |
| Type II diabetes mellitus with nephropathy                        | Diabetes with complications | 2                            |
| Type 1 diabetes mellitus with renal complications                 | Diabetes with complications | 2                            |
| Type II diabetes mellitus with mononeuropathy                     | Diabetes with complications | 2                            |
| Diabetic amyotrophy                                               | Diabetes with complications | 2                            |
| Type II diabetes mellitus with nephropathy                        | Diabetes with complications | 2                            |
| Type 1 diabetes mellitus with gastroparesis                       | Diabetes with complications | 2                            |
| Non-insulin dependent diabetes mellitus with mononeuropathy       | Diabetes with complications | 2                            |
| Insulin dependent diabetes mellitus with diabetic cataract        | Diabetes with complications | 2                            |
| Diabetic nephropathy                                              | Diabetes with complications | 2                            |
| O/E - right eye preproliferative diabetic retinopathy             | Diabetes with complications | 2                            |
| Type 1 diabetes mellitus with neuropathic arthropathy             | Diabetes with complications | 2                            |
| Type II diabetes mellitus with polyneuropathy                     | Diabetes with complications | 2                            |

| <b>Read/OXMIS term</b>                                    | <b>Disease category</b>     | <b>Charlson score weight</b> |
|-----------------------------------------------------------|-----------------------------|------------------------------|
| Other specified diabetes mellitus with neurological comps | Diabetes with complications | 2                            |
| KIMMELSTIEL- WILSON DISEASE/SYNDROME                      | Diabetes with complications | 2                            |
| Type 2 diabetes mellitus with neuropathic arthropathy     | Diabetes with complications | 2                            |
| Type 2 diabetes mellitus with renal complications         | Diabetes with complications | 2                            |
| Diabetes mellitus with ophthalmic manifestation           | Diabetes with complications | 2                            |
| Proliferative diabetic retinopathy                        | Diabetes with complications | 2                            |
| Type II diabetes mellitus with neurological complications | Diabetes with complications | 2                            |
| Diabetes mellitus with nephropathy NOS                    | Diabetes with complications | 2                            |
| Type 1 diabetes mellitus with ophthalmic complications    | Diabetes with complications | 2                            |
| Flaccid paraplegia                                        | Hemiplegia                  | 2                            |
| SPASTIC PARAPLEGIA                                        | Hemiplegia                  | 2                            |
| Left hemiplegia                                           | Hemiplegia                  | 2                            |
| O/E - paraplegia                                          | Hemiplegia                  | 2                            |
| HYPERTENSIVE HEMIPLEGIA                                   | Hemiplegia                  | 2                            |
| PARAPLEGIA                                                | Hemiplegia                  | 2                            |
| Hemiplegia NOS                                            | Hemiplegia                  | 2                            |
| Congenital paraplegia                                     | Hemiplegia                  | 2                            |
| O/E - hemiplegia                                          | Hemiplegia                  | 2                            |
| HEMIPLEGIA FLACCID                                        | Hemiplegia                  | 2                            |
| HEMIPLEGIA LEFT                                           | Hemiplegia                  | 2                            |
| Spastic hemiplegia                                        | Hemiplegia                  | 2                            |
| Right hemiplegia                                          | Hemiplegia                  | 2                            |
| Paraplegia - congenital                                   | Hemiplegia                  | 2                            |
| Spastic paraplegia                                        | Hemiplegia                  | 2                            |
| HEMIPLEGIA WITH HYPERTENSION                              | Hemiplegia                  | 2                            |
| Paraplegia                                                | Hemiplegia                  | 2                            |
| PARALYSIS HEMIPLEGIA                                      | Hemiplegia                  | 2                            |
| Hereditary spastic paraplegia                             | Hemiplegia                  | 2                            |
| HEMIPLEGIA RIGHT                                          | Hemiplegia                  | 2                            |
| Flaccid hemiplegia                                        | Hemiplegia                  | 2                            |
| Hemiplegia                                                | Hemiplegia                  | 2                            |
| SPASTIC HEMIPLEGIA                                        | Hemiplegia                  | 2                            |
| Secondary biliary cirrhosis                               | Mild liver disease          | 1                            |
| Fatty portal cirrhosis                                    | Mild liver disease          | 1                            |
| Biliary cirrhosis NOS                                     | Mild liver disease          | 1                            |
| Chronic hepatitis                                         | Mild liver disease          | 1                            |
| Chronic hepatitis unspecified                             | Mild liver disease          | 1                            |
| Multilobular portal cirrhosis                             | Mild liver disease          | 1                            |
| Toxic liver disease with fibrosis and cirrhosis of liver  | Mild liver disease          | 1                            |
| Pigmentary cirrhosis of liver                             | Mild liver disease          | 1                            |

| <b>Read/OXMIS term</b>                                       | <b>Disease category</b> | <b>Charlson score weight</b> |
|--------------------------------------------------------------|-------------------------|------------------------------|
| Laennec's cirrhosis, non-alcoholic                           | Mild liver disease      | 1                            |
| LIVER CIRRHOSIS                                              | Mild liver disease      | 1                            |
| Chronic alcoholic hepatitis                                  | Mild liver disease      | 1                            |
| Macronodular cirrhosis of liver                              | Mild liver disease      | 1                            |
| Chronic active hepatitis                                     | Mild liver disease      | 1                            |
| Unilobular portal cirrhosis                                  | Mild liver disease      | 1                            |
| HEPATITIS CHRONIC                                            | Mild liver disease      | 1                            |
| SECONDARY BILIARY CIRRHOSIS (LIVER)                          | Mild liver disease      | 1                            |
| Portal cirrhosis unspecified                                 | Mild liver disease      | 1                            |
| Non-alcoholic cirrhosis NOS                                  | Mild liver disease      | 1                            |
| Alcoholic cirrhosis of liver                                 | Mild liver disease      | 1                            |
| Pipe-stem portal cirrhosis                                   | Mild liver disease      | 1                            |
| Portal cirrhosis                                             | Mild liver disease      | 1                            |
| Diffuse nodular cirrhosis                                    | Mild liver disease      | 1                            |
| PRIMARY BILIARY CIRRHOSIS (LIVER)                            | Mild liver disease      | 1                            |
| HEPATITIS CHRONIC ACTIVE                                     | Mild liver disease      | 1                            |
| CIRRHOSIS                                                    | Mild liver disease      | 1                            |
| MICRONODULAR CIRRHOSIS                                       | Mild liver disease      | 1                            |
| Xanthomatous portal cirrhosis                                | Mild liver disease      | 1                            |
| Cirrhosis of liver NOS                                       | Mild liver disease      | 1                            |
| Recurrent hepatitis                                          | Mild liver disease      | 1                            |
| [X]Other and unspecified cirrhosis of liver                  | Mild liver disease      | 1                            |
| Cirrhosis and chronic liver disease                          | Mild liver disease      | 1                            |
| Syphilitic portal cirrhosis                                  | Mild liver disease      | 1                            |
| Glycogenosis with hepatic cirrhosis                          | Mild liver disease      | 1                            |
| CIRRHOSIS ALCOHOLIC                                          | Mild liver disease      | 1                            |
| Cryptogenic cirrhosis of liver                               | Mild liver disease      | 1                            |
| Primary biliary cirrhosis                                    | Mild liver disease      | 1                            |
| Biliary cirrhosis                                            | Mild liver disease      | 1                            |
| Cirrhosis - non alcoholic                                    | Mild liver disease      | 1                            |
| Hepatitis unspecified                                        | Mild liver disease      | 1                            |
| Cardiac portal cirrhosis                                     | Mild liver disease      | 1                            |
| Chronic persistent hepatitis                                 | Mild liver disease      | 1                            |
| Acute yellow atrophy                                         | Mild liver disease      | 1                            |
| Toxic portal cirrhosis                                       | Mild liver disease      | 1                            |
| MACRONODULAR CIRRHOSIS                                       | Mild liver disease      | 1                            |
| HEPATITIS CHRONIC AGGRESSIVE                                 | Mild liver disease      | 1                            |
| Portal fibrosis without cirrhosis                            | Mild liver disease      | 1                            |
| Chronic aggressive hepatitis                                 | Mild liver disease      | 1                            |
| Subacute yellow atrophy                                      | Mild liver disease      | 1                            |
| Postnecrotic cirrhosis of liver                              | Mild liver disease      | 1                            |
| Florid cirrhosis                                             | Mild liver disease      | 1                            |
| Chronic hepatitis NOS                                        | Mild liver disease      | 1                            |
| Oesophageal varices in alcoholic cirrhosis of the liver      | Mod liver disease       | 3                            |
| Liver abscess and chronic liver disease causing sequelae NOS | Mod liver disease       | 3                            |

| <b>Read/OXMIS term</b>                                      | <b>Disease category</b> | <b>Charlson score weight</b> |
|-------------------------------------------------------------|-------------------------|------------------------------|
| Oesophageal varices without bleeding                        | Mod liver disease       | 3                            |
| [X]Oesophageal varices in diseases classified elsewhere     | Mod liver disease       | 3                            |
| Other sequelae of chronic liver disease                     | Mod liver disease       | 3                            |
| Oesophageal varices with bleeding in diseases EC            | Mod liver disease       | 3                            |
| SYNDROME HEPATORENAL                                        | Mod liver disease       | 3                            |
| Hepatorenal syndrome                                        | Mod liver disease       | 3                            |
| PORTAL HYPERTENSION                                         | Mod liver disease       | 3                            |
| Oesophageal varices with bleeding                           | Mod liver disease       | 3                            |
| Oesophageal varices in diseases EC                          | Mod liver disease       | 3                            |
| Hepatic coma                                                | Mod liver disease       | 3                            |
| Oesophageal varices NOS                                     | Mod liver disease       | 3                            |
| Oesophageal varices                                         | Mod liver disease       | 3                            |
| Portal hypertension                                         | Mod liver disease       | 3                            |
| Oesophageal varices in cirrhosis of the liver               | Mod liver disease       | 3                            |
| Other specified viral hepatitis with hepatic coma NOS       | Mod liver disease       | 3                            |
| Rigid oesophagoscopy injection sclerotherapy oesoph varices | Mod liver disease       | 3                            |
| HEPATIC COMA                                                | Mod liver disease       | 3                            |
| Oesophageal varices without bleeding in diseases EC         | Mod liver disease       | 3                            |
| Oesophageal varices in diseases EC NOS                      | Mod liver disease       | 3                            |
| Other specified anterior myocardial infarction              | Myocardial infarction   | 1                            |
| Acute myocardial infarction NOS                             | Myocardial infarction   | 1                            |
| Heart attack                                                | Myocardial infarction   | 1                            |
| MI - acute myocardial infarction                            | Myocardial infarction   | 1                            |
| Lateral myocardial infarction NOS                           | Myocardial infarction   | 1                            |
| THROMBOSIS CORONARY                                         | Myocardial infarction   | 1                            |
| Acute subendocardial infarction                             | Myocardial infarction   | 1                            |
| H/O: Myocardial infarction in last year                     | Myocardial infarction   | 1                            |
| Other acute myocardial infarction                           | Myocardial infarction   | 1                            |
| Acute inferoposterior infarction                            | Myocardial infarction   | 1                            |
| CORONARY INFARCTION                                         | Myocardial infarction   | 1                            |
| Acute myocardial infarction                                 | Myocardial infarction   | 1                            |
| Acute anterolateral infarction                              | Myocardial infarction   | 1                            |
| Personal history of myocardial infarction                   | Myocardial infarction   | 1                            |
| Acute ST segment elevation myocardial infarction            | Myocardial infarction   | 1                            |
| Cardiac rupture following myocardial infarction (MI)        | Myocardial infarction   | 1                            |
| Acute non-ST segment elevation myocardial infarction        | Myocardial infarction   | 1                            |
| Acute non-Q wave infarction                                 | Myocardial infarction   | 1                            |
| Acute anteroseptal infarction                               | Myocardial infarction   | 1                            |
| Old myocardial infarction                                   | Myocardial infarction   | 1                            |
| Silent myocardial infarction                                | Myocardial infarction   | 1                            |
| Healed myocardial infarction                                | Myocardial infarction   | 1                            |
| Coronary thrombosis                                         | Myocardial infarction   | 1                            |
| HEART ATTACK                                                | Myocardial infarction   | 1                            |
| Other acute myocardial infarction NOS                       | Myocardial infarction   | 1                            |

| <b>Read/OXMIS term</b>                                       | <b>Disease category</b> | <b>Charlson score weight</b> |
|--------------------------------------------------------------|-------------------------|------------------------------|
| Acute inferolateral infarction                               | Myocardial infarction   | 1                            |
| Acute duodenal ulcer unspecified                             | Peptic ulcer disease    | 1                            |
| Endoscopic injection haemostasis of gastric ulcer            | Peptic ulcer disease    | 1                            |
| Unspecified gastrojejunal ulcer with obstruction             | Peptic ulcer disease    | 1                            |
| Peptic ulcer - (PU) site unspecified                         | Peptic ulcer disease    | 1                            |
| ULCER STOMACH PERFORATED                                     | Peptic ulcer disease    | 1                            |
| Peptic ulcer of oesophagus                                   | Peptic ulcer disease    | 1                            |
| ULCER GASTROJEJUNAL                                          | Peptic ulcer disease    | 1                            |
| Unspecified duodenal ulcer NOS                               | Peptic ulcer disease    | 1                            |
| EXCISION PEPTIC ULCER                                        | Peptic ulcer disease    | 1                            |
| Pyloric ulcer                                                | Peptic ulcer disease    | 1                            |
| ULCER GASTRIC PERFORATED                                     | Peptic ulcer disease    | 1                            |
| Chronic gastrojejunal ulcer with perforation                 | Peptic ulcer disease    | 1                            |
| Acute gastric ulcer                                          | Peptic ulcer disease    | 1                            |
| Unspecified duodenal ulcer                                   | Peptic ulcer disease    | 1                            |
| Chronic duodenal ulcer unspecified                           | Peptic ulcer disease    | 1                            |
| Bleeding acute gastric ulcer                                 | Peptic ulcer disease    | 1                            |
| Unspec gastric ulcer; unspec haemorrhage and/or perforation  | Peptic ulcer disease    | 1                            |
| ULCER DUODENUM                                               | Peptic ulcer disease    | 1                            |
| Chronic gastric ulcer unspecified                            | Peptic ulcer disease    | 1                            |
| Chronic gastric ulcer with haemorrhage                       | Peptic ulcer disease    | 1                            |
| Stomal ulcer                                                 | Peptic ulcer disease    | 1                            |
| Chronic peptic ulcer unspecified                             | Peptic ulcer disease    | 1                            |
| Acute gastric ulcer unspecified                              | Peptic ulcer disease    | 1                            |
| Peptic ulcer NOS                                             | Peptic ulcer disease    | 1                            |
| Prepyloric ulcer                                             | Peptic ulcer disease    | 1                            |
| Acute gastric ulcer with haemorrhage and perforation         | Peptic ulcer disease    | 1                            |
| Operation on gastric ulcer NOS                               | Peptic ulcer disease    | 1                            |
| Unspecified gastrojejunal ulcer with haemorrhage             | Peptic ulcer disease    | 1                            |
| Chronic duodenal ulcer with obstruction                      | Peptic ulcer disease    | 1                            |
| Acute peptic ulcer NOS                                       | Peptic ulcer disease    | 1                            |
| Unspecified duodenal ulcer with obstruction                  | Peptic ulcer disease    | 1                            |
| Unspecified gastric ulcer with haemorrhage                   | Peptic ulcer disease    | 1                            |
| Acute gastrojejunal ulcer with obstruction                   | Peptic ulcer disease    | 1                            |
| Unspecified duodenal ulcer without mention of complication   | Peptic ulcer disease    | 1                            |
| Duodenal ulcer disease                                       | Peptic ulcer disease    | 1                            |
| Chronic duodenal ulcer without mention of complication       | Peptic ulcer disease    | 1                            |
| Unspecified gastrojejunal ulcer with perforation             | Peptic ulcer disease    | 1                            |
| Gastric ulcer - (GU)                                         | Peptic ulcer disease    | 1                            |
| Chronic gastrojejunal ulcer unspecified                      | Peptic ulcer disease    | 1                            |
| ULCER GASTROJEJUNAL PERFORATED                               | Peptic ulcer disease    | 1                            |
| Chronic gastrojejunal ulcer with haemorrhage and perforation | Peptic ulcer disease    | 1                            |
| Unspecified gastric ulcer with obstruction                   | Peptic ulcer disease    | 1                            |

| <b>Read/OXMIS term</b>                                       | <b>Disease category</b> | <b>Charlson score weight</b> |
|--------------------------------------------------------------|-------------------------|------------------------------|
| Unspecified peptic ulcer                                     | Peptic ulcer disease    | 1                            |
| Chronic peptic ulcer                                         | Peptic ulcer disease    | 1                            |
| Acute duodenal ulcer NOS                                     | Peptic ulcer disease    | 1                            |
| Acute gastrojejunal ulcer without mention of complication    | Peptic ulcer disease    | 1                            |
| Acute gastric ulcer with perforation                         | Peptic ulcer disease    | 1                            |
| Chronic gastric ulcer with obstruction                       | Peptic ulcer disease    | 1                            |
| Chronic duodenal ulcer                                       | Peptic ulcer disease    | 1                            |
| Unspec gastrojejunal ulcer; unspec haemorrhage/perforation   | Peptic ulcer disease    | 1                            |
| Gastrocolic ulcer                                            | Peptic ulcer disease    | 1                            |
| Acute peptic ulcer                                           | Peptic ulcer disease    | 1                            |
| Unspecified gastric ulcer with perforation                   | Peptic ulcer disease    | 1                            |
| Acute duodenal ulcer with haemorrhage and perforation        | Peptic ulcer disease    | 1                            |
| ULCER PEPTIC DUODENUM                                        | Peptic ulcer disease    | 1                            |
| Operations on duodenal ulcer                                 | Peptic ulcer disease    | 1                            |
| Acute duodenal ulcer with haemorrhage                        | Peptic ulcer disease    | 1                            |
| ULCER PEPTIC DUODENUM PERFORATED                             | Peptic ulcer disease    | 1                            |
| Unspecified peptic ulcer with haemorrhage and perforation    | Peptic ulcer disease    | 1                            |
| Unspec gastrojejunal ulcer with haemorrhage and perforation  | Peptic ulcer disease    | 1                            |
| ULCER PEPTIC STOMACH PERFORATED                              | Peptic ulcer disease    | 1                            |
| Chronic peptic ulcer with haemorrhage and perforation        | Peptic ulcer disease    | 1                            |
| Bleeding chronic gastric ulcer                               | Peptic ulcer disease    | 1                            |
| Closure of perforated gastric ulcer                          | Peptic ulcer disease    | 1                            |
| Acute duodenal ulcer with perforation                        | Peptic ulcer disease    | 1                            |
| Acute peptic ulcer with perforation                          | Peptic ulcer disease    | 1                            |
| Suture of ulcer of stomach NEC                               | Peptic ulcer disease    | 1                            |
| Acute gastrojejunal ulcer with haemorrhage                   | Peptic ulcer disease    | 1                            |
| Unspecified duodenal ulcer with perforation                  | Peptic ulcer disease    | 1                            |
| Chronic gastric ulcer NOS                                    | Peptic ulcer disease    | 1                            |
| ULCER DUODENAL RECURRENCE                                    | Peptic ulcer disease    | 1                            |
| Unspecified gastric ulcer NOS                                | Peptic ulcer disease    | 1                            |
| Gastrojejunal ulcer NOS                                      | Peptic ulcer disease    | 1                            |
| Unspecified gastrojejunal ulcer without mention complication | Peptic ulcer disease    | 1                            |
| Gastric ulcer NOS                                            | Peptic ulcer disease    | 1                            |
| Unspecified gastrojejunal ulcer                              | Peptic ulcer disease    | 1                            |
| Chronic gastrojejunal ulcer NOS                              | Peptic ulcer disease    | 1                            |
| Unspec peptic ulcer; unspec haemorrhage and/or perforation   | Peptic ulcer disease    | 1                            |
| Balfour excision of gastric ulcer                            | Peptic ulcer disease    | 1                            |
| Unspec duodenal ulcer; unspec haemorrhage and/or perforation | Peptic ulcer disease    | 1                            |
| Chronic gastric ulcer without mention of complication        | Peptic ulcer disease    | 1                            |
| Acute gastric ulcer without mention of complication          | Peptic ulcer disease    | 1                            |
| Acute peptic ulcer without mention of complication           | Peptic ulcer disease    | 1                            |

| <b>Read/OXMIS term</b>                                     | <b>Disease category</b> | <b>Charlson score weight</b> |
|------------------------------------------------------------|-------------------------|------------------------------|
| ULCER PEPTIC PERFORATED                                    | Peptic ulcer disease    | 1                            |
| Chronic gastric ulcer with haemorrhage and perforation     | Peptic ulcer disease    | 1                            |
| Acute gastrojejunal ulcer with haemorrhage and perforation | Peptic ulcer disease    | 1                            |
| Unspecified peptic ulcer without mention of complication   | Peptic ulcer disease    | 1                            |
| Gastrojejunal ulcer (GJU)                                  | Peptic ulcer disease    | 1                            |
| Unspecified gastric ulcer                                  | Peptic ulcer disease    | 1                            |
| Peptic ulcer symptoms                                      | Peptic ulcer disease    | 1                            |
| Acute duodenal ulcer                                       | Peptic ulcer disease    | 1                            |
| Acute peptic ulcer with obstruction                        | Peptic ulcer disease    | 1                            |
| Chronic gastrojejunal ulcer with obstruction               | Peptic ulcer disease    | 1                            |
| Unspecified peptic ulcer with haemorrhage                  | Peptic ulcer disease    | 1                            |
| Acute duodenal ulcer without mention of complication       | Peptic ulcer disease    | 1                            |
| Chronic duodenal ulcer with haemorrhage and perforation    | Peptic ulcer disease    | 1                            |
| Closure of perforated duodenal ulcer                       | Peptic ulcer disease    | 1                            |
| Chronic peptic ulcer NOS                                   | Peptic ulcer disease    | 1                            |
| Stress ulcer NOS                                           | Peptic ulcer disease    | 1                            |
| Acute peptic ulcer unspecified                             | Peptic ulcer disease    | 1                            |
| Anti-platelet induced gastric ulcer                        | Peptic ulcer disease    | 1                            |
| Acute gastric ulcer NOS                                    | Peptic ulcer disease    | 1                            |
| Chronic gastric ulcer                                      | Peptic ulcer disease    | 1                            |
| Acute gastric ulcer with obstruction                       | Peptic ulcer disease    | 1                            |
| Chronic duodenal ulcer NOS                                 | Peptic ulcer disease    | 1                            |
| ULCER PEPTIC                                               | Peptic ulcer disease    | 1                            |
| Chronic peptic ulcer without mention of complication       | Peptic ulcer disease    | 1                            |
| Duodenal ulcer - (DU)                                      | Peptic ulcer disease    | 1                            |
| Chronic gastrojejunal ulcer                                | Peptic ulcer disease    | 1                            |
| Unspecified gastric ulcer without mention of complication  | Peptic ulcer disease    | 1                            |
| Chronic gastric ulcer with perforation                     | Peptic ulcer disease    | 1                            |
| Duodenal erosion                                           | Peptic ulcer disease    | 1                            |
| REPAIR PERFORATED GASTRIC ULCER                            | Peptic ulcer disease    | 1                            |
| Unspecified peptic ulcer with obstruction                  | Peptic ulcer disease    | 1                            |
| Closure of gastric ulcer NEC                               | Peptic ulcer disease    | 1                            |
| Chronic peptic ulcer with obstruction                      | Peptic ulcer disease    | 1                            |
| ULCER MARGINAL                                             | Peptic ulcer disease    | 1                            |
| Multiple gastric ulcers                                    | Peptic ulcer disease    | 1                            |
| Unspecified gastrojejunal ulcer NOS                        | Peptic ulcer disease    | 1                            |
| [V]Personal history of peptic ulcer                        | Peptic ulcer disease    | 1                            |
| Acute peptic ulcer with haemorrhage                        | Peptic ulcer disease    | 1                            |
| Resection of gastric ulcer by cautery                      | Peptic ulcer disease    | 1                            |
| Acute duodenal ulcer with obstruction                      | Peptic ulcer disease    | 1                            |
| [V] Personal history of gastric ulcer                      | Peptic ulcer disease    | 1                            |
| ULCER PEPTIC STOMACH                                       | Peptic ulcer disease    | 1                            |

| Read/OXMIS term                                             | Disease category            | Charlson score weight |
|-------------------------------------------------------------|-----------------------------|-----------------------|
| Unspecified duodenal ulcer with haemorrhage and perforation | Peptic ulcer disease        | 1                     |
| Unspecified peptic ulcer NOS                                | Peptic ulcer disease        | 1                     |
| Stomach ulcer operations                                    | Peptic ulcer disease        | 1                     |
| ULCER DUODENUM PERFORATED                                   | Peptic ulcer disease        | 1                     |
| Perforated chronic gastric ulcer                            | Peptic ulcer disease        | 1                     |
| Duodenal ulcer NOS                                          | Peptic ulcer disease        | 1                     |
| Acute gastrojejunal ulcer with perforation                  | Peptic ulcer disease        | 1                     |
| Chronic peptic ulcer with haemorrhage                       | Peptic ulcer disease        | 1                     |
| Chronic gastrojejunal ulcer without mention of complication | Peptic ulcer disease        | 1                     |
| Chronic peptic ulcer with perforation                       | Peptic ulcer disease        | 1                     |
| Recurrent duodenal ulcer                                    | Peptic ulcer disease        | 1                     |
| REPAIR PERFORATED PEPTIC ULCER                              | Peptic ulcer disease        | 1                     |
| Acute peptic ulcer with haemorrhage and perforation         | Peptic ulcer disease        | 1                     |
| Unspecified gastric ulcer with haemorrhage and perforation  | Peptic ulcer disease        | 1                     |
| Chronic gastrojejunal ulcer with haemorrhage                | Peptic ulcer disease        | 1                     |
| Bleeding chronic duodenal ulcer                             | Peptic ulcer disease        | 1                     |
| ULCER PREPYLORIC                                            | Peptic ulcer disease        | 1                     |
| Other specified operation on gastric ulcer                  | Peptic ulcer disease        | 1                     |
| Acute gastrojejunal ulcer NOS                               | Peptic ulcer disease        | 1                     |
| Acute gastrojejunal ulcer unspecified                       | Peptic ulcer disease        | 1                     |
| Unspecified peptic ulcer with perforation                   | Peptic ulcer disease        | 1                     |
| Acute gastric ulcer with haemorrhage                        | Peptic ulcer disease        | 1                     |
| ULCER STOMACH                                               | Peptic ulcer disease        | 1                     |
| DUODENAL ULCER BLEEDING                                     | Peptic ulcer disease        | 1                     |
| Operations on gastric ulcer                                 | Peptic ulcer disease        | 1                     |
| Acute gastrojejunal ulcer                                   | Peptic ulcer disease        | 1                     |
| Juxtarenal aortic aneurysm                                  | Peripheral vascular disease | 1                     |
| Tube graft abdominal Aortic aneurysm (emergency)            | Peripheral vascular disease | 1                     |
| [D]Gangrene                                                 | Peripheral vascular disease | 1                     |
| Ruptured aortic aneurysm NOS                                | Peripheral vascular disease | 1                     |
| H/O: aortic aneurysm                                        | Peripheral vascular disease | 1                     |
| Other peripheral vascular disease                           | Peripheral vascular disease | 1                     |
| [X]Aortic aneurysm of unspecified site, ruptured            | Peripheral vascular disease | 1                     |
| Dissecting aortic aneurysm                                  | Peripheral vascular disease | 1                     |
| Other specified peripheral vascular disease                 | Peripheral vascular disease | 1                     |
| Presenile gangrene                                          | Peripheral vascular disease | 1                     |
| Ruptured suprarenal aortic aneurysm                         | Peripheral vascular disease | 1                     |



| Read/OXMIS term                                              | Disease category            | Charlson score weight |
|--------------------------------------------------------------|-----------------------------|-----------------------|
| Thoracoabdominal aortic aneurysm, ruptured                   | Peripheral vascular disease | 1                     |
| Aortic aneurysm                                              | Peripheral vascular disease | 1                     |
| [D]Gangrene of toe in diabetic                               | Peripheral vascular disease | 1                     |
| Gangrene of toe                                              | Peripheral vascular disease | 1                     |
| INTERMITTENT CLAUDICATION                                    | Peripheral vascular disease | 1                     |
| Peripheral gangrene                                          | Peripheral vascular disease | 1                     |
| Thoracoabdominal aortic aneurysm, without mention of rupture | Peripheral vascular disease | 1                     |
| Gangrene of hand                                             | Peripheral vascular disease | 1                     |
| GANGRENE TOE                                                 | Peripheral vascular disease | 1                     |
| Emergency repair of aortic aneurysm                          | Peripheral vascular disease | 1                     |
| Y graft abdominal Aortic aneurysm                            | Peripheral vascular disease | 1                     |
| Other specified peripheral vascular disease NOS              | Peripheral vascular disease | 1                     |
| Diabetes with gangrene                                       | Peripheral vascular disease | 1                     |
| GANGRENE FOOT                                                | Peripheral vascular disease | 1                     |
| SCROTAL GANGRENE                                             | Peripheral vascular disease | 1                     |
| [D]Widespread diabetic foot gangrene                         | Peripheral vascular disease | 1                     |
| O/E - gangrene                                               | Peripheral vascular disease | 1                     |
| Inflammatory abdominal aortic aneurysm                       | Peripheral vascular disease | 1                     |
| Gangrene of foot                                             | Peripheral vascular disease | 1                     |
| Gangrene of finger                                           | Peripheral vascular disease | 1                     |
| [D]Gangrene NOS                                              | Peripheral vascular disease | 1                     |
| Intermittent claudication                                    | Peripheral vascular disease | 1                     |
| Aortic aneurysm without mention of rupture NOS               | Peripheral vascular disease | 1                     |
| DISSECTION AORTA                                             | Peripheral vascular disease | 1                     |
| Claudication                                                 | Peripheral vascular disease | 1                     |
| Y graft of abdominal Aortic aneurysm (emergency)             | Peripheral vascular disease | 1                     |
| Thoracic aortic aneurysm without mention of rupture          | Peripheral vascular disease | 1                     |
| Peripheral ischaemic vascular disease                        | Peripheral vascular disease | 1                     |

| <b>Read/OXMIS term</b>                                     | <b>Disease category</b>     | <b>Charlson score weight</b> |
|------------------------------------------------------------|-----------------------------|------------------------------|
| ULCER WITH GANGRENE                                        | Peripheral vascular disease | 1                            |
| Thoracic aortic aneurysm which has ruptured                | Peripheral vascular disease | 1                            |
| Peripheral vascular disease NOS                            | Peripheral vascular disease | 1                            |
| Peripheral vascular disease NOS                            | Peripheral vascular disease | 1                            |
| Aortic aneurysm NOS                                        | Peripheral vascular disease | 1                            |
| Abdominal aortic aneurysm which has ruptured               | Peripheral vascular disease | 1                            |
| Aortic aneurysm repair                                     | Peripheral vascular disease | 1                            |
| AORTIC ANEURYSM                                            | Peripheral vascular disease | 1                            |
| H/O: Peripheral vascular disease procedure                 | Peripheral vascular disease | 1                            |
| Aortic aneurysm                                            | Peripheral vascular disease | 1                            |
| Ruptured abdominal aortic aneurysm                         | Peripheral vascular disease | 1                            |
| [X]Aortic aneurysm of unspecified site, nonruptured        | Peripheral vascular disease | 1                            |
| Gangrene of thumb                                          | Peripheral vascular disease | 1                            |
| [D]Gangrene, spreading cutaneous                           | Peripheral vascular disease | 1                            |
| AAA - Abdominal aortic aneurysm without mention of rupture | Peripheral vascular disease | 1                            |
| Abdominal aortic aneurysm without mention of rupture       | Peripheral vascular disease | 1                            |
| [X]Other specified peripheral vascular diseases            | Peripheral vascular disease | 1                            |
| Leaking abdominal aortic aneurysm                          | Peripheral vascular disease | 1                            |
| Tube graft of Abdominal aortic aneurysm                    | Peripheral vascular disease | 1                            |
| PVD (PERIPHERAL VASCULAR DISEASE)                          | Peripheral vascular disease | 1                            |
| GANGRENE                                                   | Peripheral vascular disease | 1                            |
| SYMMETRICAL GANGRENE EXTREMITIES                           | Peripheral vascular disease | 1                            |
| Ruptured thoracic aortic aneurysm                          | Peripheral vascular disease | 1                            |
| RENAL MEDULLARY NECROSIS                                   | Renal disease               | 2                            |
| Phosphate-losing tubular disorders                         | Renal disease               | 2                            |
| Nephritis unsp????? glomerulonephritis lesion NOS          | Renal disease               | 2                            |
| Renal dwarfism                                             | Renal disease               | 2                            |
| MESANGIOCAPILLARY GLOMERULONEPHRITIS                       | Renal disease               | 2                            |
| Acute renal failure NOS                                    | Renal disease               | 2                            |
| OSTEODYSTROPHY URAEMIC                                     | Renal disease               | 2                            |
| Acute pyelonephritis with medullary necrosis               | Renal disease               | 2                            |

| Read/OXMIS term                                                | Disease category | Charlson score weight |
|----------------------------------------------------------------|------------------|-----------------------|
| Chronic glomerulonephritis NOS                                 | Renal disease    | 2                     |
| Impaired renal function                                        | Renal disease    | 2                     |
| Chronic membranous glomerulonephritis                          | Renal disease    | 2                     |
| Chronic rapidly progressive glomerulonephritis                 | Renal disease    | 2                     |
| RENAL DISEASE                                                  | Renal disease    | 2                     |
| MEMBRANOPROLIFERATIVE GLOMERULONEPHRITIS                       | Renal disease    | 2                     |
| Nephritis unsp membranoprolif glomerulonephritis lesion        | Renal disease    | 2                     |
| Chronic kidney disease stage 2                                 | Renal disease    | 2                     |
| NEPHRITIS                                                      | Renal disease    | 2                     |
| Acute renal cortical necrosis                                  | Renal disease    | 2                     |
| Mesangioproliferative glomerulonephritis NEC                   | Renal disease    | 2                     |
| GLOMERULONEPHRITIS CHRONIC                                     | Renal disease    | 2                     |
| Nephritis, nephrosis and nephrotic syndrome                    | Renal disease    | 2                     |
| Nephropathy - chronic                                          | Renal disease    | 2                     |
| Other impaired renal function disorder NOS                     | Renal disease    | 2                     |
| OSTEODYSTROPHY AZOTAEMIC                                       | Renal disease    | 2                     |
| NEPHROPATHY MEMBRANOUS                                         | Renal disease    | 2                     |
| Nephrogenic diabetes insipidus                                 | Renal disease    | 2                     |
| Renal osteodystrophy                                           | Renal disease    | 2                     |
| Chron neph syn difuse endocap proliferativ glomerulonephritis  | Renal disease    | 2                     |
| Renal failure unspecified                                      | Renal disease    | 2                     |
| Chron nephritic syndrom difuse membranous glomerulonephritis   | Renal disease    | 2                     |
| Renal cortical necrosis unspecified                            | Renal disease    | 2                     |
| Chronic focal glomerulonephritis                               | Renal disease    | 2                     |
| CHRONIC RENAL FAILURE                                          | Renal disease    | 2                     |
| NEPHRITIS HEREDITARY                                           | Renal disease    | 2                     |
| Nephritis and nephropathy unspecified                          | Renal disease    | 2                     |
| Chronic renal failure                                          | Renal disease    | 2                     |
| [X]Heredtry nephropthy NEC difus mesangiocapilry glomneph      | Renal disease    | 2                     |
| Acute pyelonephritis without medullary necrosis                | Renal disease    | 2                     |
| Chronic glomerulonephritis                                     | Renal disease    | 2                     |
| Renal rickets                                                  | Renal disease    | 2                     |
| OSTEODYSTROPHY RENAL                                           | Renal disease    | 2                     |
| NEPHROPATHY HYPOKALAEMIC                                       | Renal disease    | 2                     |
| Chronic kidney disease stage 4                                 | Renal disease    | 2                     |
| Membranoproliferative nephritis unspecified                    | Renal disease    | 2                     |
| Nephrotic syndrome?????? glomerulonephritis                    | Renal disease    | 2                     |
| Chron neph syn difus mesangial proliferativ glomerulonephritis | Renal disease    | 2                     |
| Chronic kidney disease stage 5                                 | Renal disease    | 2                     |
| [X]Renal failure                                               | Renal disease    | 2                     |
| Impaired renal function disorder NOS                           | Renal disease    | 2                     |
| End stage renal failure                                        | Renal disease    | 2                     |

| Read/OXMIS term                                             | Disease category        | Charlson score weight |
|-------------------------------------------------------------|-------------------------|-----------------------|
| RENAL FAILURE                                               | Renal disease           | 2                     |
| Chronic pyelonephritis without medullary necrosis           | Renal disease           | 2                     |
| Other acute renal failure                                   | Renal disease           | 2                     |
| H/O: nephritis                                              | Renal disease           | 2                     |
| Nephritis - chronic                                         | Renal disease           | 2                     |
| Chronic kidney disease stage 1                              | Renal disease           | 2                     |
| Focal membranoproliferative glomerulonephritis              | Renal disease           | 2                     |
| CHRONIC NEPHRITIS                                           | Renal disease           | 2                     |
| Nephritis and nephropathy unspecified                       | Renal disease           | 2                     |
| Acute renal medullary necrosis                              | Renal disease           | 2                     |
| Chronic membranoproliferative glomerulonephritis            | Renal disease           | 2                     |
| Mesangiocapillary glomerulonephritis NEC                    | Renal disease           | 2                     |
| Renal infantilism                                           | Renal disease           | 2                     |
| Acute nephritis with lesions of necrotising glomerulitis    | Renal disease           | 2                     |
| Chronic kidney disease stage 3                              | Renal disease           | 2                     |
| Other chronic glomerulonephritis NOS                        | Renal disease           | 2                     |
| Chronic diffuse glomerulonephritis                          | Renal disease           | 2                     |
| Renal osteodystrophy NOS                                    | Renal disease           | 2                     |
| Nephrotic syn,diffuse mesangiocapillary glomerulonephritis  | Renal disease           | 2                     |
| Renal medullary necrosis unspecified                        | Renal disease           | 2                     |
| Chronic nephritic syn diffuse crescentic glomerulonephritis | Renal disease           | 2                     |
| Hypokalaemic nephropathy                                    | Renal disease           | 2                     |
| [X]Other chronic renal failure                              | Renal disease           | 2                     |
| Chronic neph syn difus mesangiocapillary glomerulonephritis | Renal disease           | 2                     |
| Chronic glomerulonephritis diseases EC                      | Renal disease           | 2                     |
| Chronic pyelonephritis with medullary necrosis              | Renal disease           | 2                     |
| [X]Other acute renal failure                                | Renal disease           | 2                     |
| LUPUS ERYTHEMATOSUS SYSTEMIC                                | Rheumatological disease | 1                     |
| Felty's syndrome                                            | Rheumatological disease | 1                     |
| RHEUMATISM                                                  | Rheumatological disease | 1                     |
| RHEUMATISM NONARTICULAR                                     | Rheumatological disease | 1                     |
| RHEUMATOID ARTHRITIS                                        | Rheumatological disease | 1                     |
| [X]Rheumatoid arthritis????? organs or systems              | Rheumatological disease | 1                     |
| Systemic sclerosis induced by drugs and chemicals           | Rheumatological disease | 1                     |
| Caplan's syndrome                                           | Rheumatological disease | 1                     |
| RHEUMATOID ARTHRITIS SPINE                                  | Rheumatological disease | 1                     |
| Progressive systemic sclerosis                              | Rheumatological disease | 1                     |

| Read/OXMIS term                                             | Disease category        | Charlson score weight |
|-------------------------------------------------------------|-------------------------|-----------------------|
| Systemic sclerosis                                          | Rheumatological disease | 1                     |
| Rheumatoid arthritis of hip                                 | Rheumatological disease | 1                     |
| Systemic lupus erythematosus with organ or sys involv       | Rheumatological disease | 1                     |
| Fibrosing alveolitis associated with rheumatoid arthritis   | Rheumatological disease | 1                     |
| Seropositive erosive rheumatoid arthritis                   | Rheumatological disease | 1                     |
| Systemic lupus erythematosus                                | Rheumatological disease | 1                     |
| Rheumatoid arthritis of other tarsal joint                  | Rheumatological disease | 1                     |
| LUPUS ERYTHEMATOSUS ACUTE                                   | Rheumatological disease | 1                     |
| Seropositive rheumatoid arthritis, unspecified              | Rheumatological disease | 1                     |
| [X]Seropositive rheumatoid arthritis, unspecified           | Rheumatological disease | 1                     |
| Rheumatoid arthritis of DIP joint of finger                 | Rheumatological disease | 1                     |
| Rheumatoid arthritis of sternoclavicular joint              | Rheumatological disease | 1                     |
| Rheumatism unspecified                                      | Rheumatological disease | 1                     |
| Muscular rheumatism                                         | Rheumatological disease | 1                     |
| SERO POSITIVE RHEUMATOID ARTHRITIS                          | Rheumatological disease | 1                     |
| Giant cell arteritis with polymyalgia rheumatica            | Rheumatological disease | 1                     |
| Polymyalgia rheumatica                                      | Rheumatological disease | 1                     |
| SCLERODERMA DIFFUSE                                         | Rheumatological disease | 1                     |
| Rheumatoid arthritis of PIP joint of finger                 | Rheumatological disease | 1                     |
| Libman-Sacks disease                                        | Rheumatological disease | 1                     |
| SYSTEMIC LUPUS ERYTHEMATOSUS WITH RENAL                     | Rheumatological disease | 1                     |
| Systemic lupus erythematosus with pericarditis              | Rheumatological disease | 1                     |
| Rheumatoid arthritis of IP joint of toe                     | Rheumatological disease | 1                     |
| Rheumatoid arthritis of MCP joint                           | Rheumatological disease | 1                     |
| Other specified nonarticular rheumatism                     | Rheumatological disease | 1                     |
| Lung disease with systemic sclerosis                        | Rheumatological disease | 1                     |
| Rheumatoid arthritis and other inflammatory polyarthropathy | Rheumatological disease | 1                     |
| Seronegative rheumatoid arthritis                           | Rheumatological disease | 1                     |

| Read/OXMIS term                                | Disease category        | Charlson score weight |
|------------------------------------------------|-------------------------|-----------------------|
| RHEUMATISM MUSCULAR ARM                        | Rheumatological disease | 1                     |
| Rheumatoid carditis                            | Rheumatological disease | 1                     |
| SCLERODERMA ACROSCLEROTIC                      | Rheumatological disease | 1                     |
| Lung disease with systemic lupus erythematosus | Rheumatological disease | 1                     |
| Lupus nephritis                                | Rheumatological disease | 1                     |
| Acrosclerosis                                  | Rheumatological disease | 1                     |
| POLYMYOSITIS                                   | Rheumatological disease | 1                     |
| RHEUMATOID ARTHRITIS INCREASED ACTIVITY        | Rheumatological disease | 1                     |
| Disseminated lupus erythematosus               | Rheumatological disease | 1                     |
| Flare of rheumatoid arthritis                  | Rheumatological disease | 1                     |
| Rheumatoid arthritis                           | Rheumatological disease | 1                     |
| Sero negative polyarthritis                    | Rheumatological disease | 1                     |
| [X]Other forms of systemic sclerosis           | Rheumatological disease | 1                     |
| SERO NEGATIVE RHEUMATOID ARTHRITIS             | Rheumatological disease | 1                     |
| Rheumatism or fibrositis NOS                   | Rheumatological disease | 1                     |
| SYNDROME FELTY'S                               | Rheumatological disease | 1                     |
| RHEUMATISM HANDS                               | Rheumatological disease | 1                     |
| Rheumatoid arthritis of lesser MTP joint       | Rheumatological disease | 1                     |
| Polymyositis ossificans                        | Rheumatological disease | 1                     |
| SCLERODERMA                                    | Rheumatological disease | 1                     |
| [X]Other specified rheumatoid arthritis        | Rheumatological disease | 1                     |
| MONOARTICULAR RHEUMATISM                       | Rheumatological disease | 1                     |
| Myopathy due to scleroderma                    | Rheumatological disease | 1                     |
| Myopathy due to rheumatoid arthritis           | Rheumatological disease | 1                     |
| Rheumatoid lung disease                        | Rheumatological disease | 1                     |
| Rheumatoid arthritis of subtalar joint         | Rheumatological disease | 1                     |
| LIBMAN- SACKS DISEASE                          | Rheumatological disease | 1                     |
| Rheumatoid arthritis of shoulder               | Rheumatological disease | 1                     |

| <b>Read/OXMIS term</b>                             | <b>Disease category</b> | <b>Charlson score weight</b> |
|----------------------------------------------------|-------------------------|------------------------------|
| Rheumatoid arthritis of talonavicular joint        | Rheumatological disease | 1                            |
| Rheumatoid arthritis of knee                       | Rheumatological disease | 1                            |
| RHEUMATISM HANDS ACUTE                             | Rheumatological disease | 1                            |
| Rheumatoid arthritis of ankle                      | Rheumatological disease | 1                            |
| Endemic polyarthritis                              | Rheumatological disease | 1                            |
| [X]Other forms of systemic lupus erythematosus     | Rheumatological disease | 1                            |
| [X]Other seropositive rheumatoid arthritis         | Rheumatological disease | 1                            |
| RHEUMATISM NONARTICULAR SHOULDER                   | Rheumatological disease | 1                            |
| Polymyositis                                       | Rheumatological disease | 1                            |
| Lung disease with polymyositis                     | Rheumatological disease | 1                            |
| Rheumatoid arthritis of tibio-fibular joint        | Rheumatological disease | 1                            |
| Rheumatoid arthritis of distal radio-ulnar joint   | Rheumatological disease | 1                            |
| Rheumatism and fibrositis unspecified              | Rheumatological disease | 1                            |
| Rheumatoid arthritis of sacro-iliac joint          | Rheumatological disease | 1                            |
| Myopathy due to disseminated lupus erythematosus   | Rheumatological disease | 1                            |
| LUPUS ERYTHEMATOSUS DISSEMINATED                   | Rheumatological disease | 1                            |
| SCLERODERMA GENERALIZED                            | Rheumatological disease | 1                            |
| Rheumatoid arthritis of 1st MTP joint              | Rheumatological disease | 1                            |
| Scleroderma                                        | Rheumatological disease | 1                            |
| Nonarticular rheumatism NOS                        | Rheumatological disease | 1                            |
| POLYMYALGIA RHEUMATICA                             | Rheumatological disease | 1                            |
| Rheumatoid arthritis of elbow                      | Rheumatological disease | 1                            |
| Drug-induced systemic lupus erythematosus          | Rheumatological disease | 1                            |
| Nephrotic syndrome in systemic lupus erythematosus | Rheumatological disease | 1                            |
| Rheumatoid lung                                    | Rheumatological disease | 1                            |
| Systemic lupus erythematosus NOS                   | Rheumatological disease | 1                            |
| Rheumatoid arthritis of wrist                      | Rheumatological disease | 1                            |
| Hand rheumatism                                    | Rheumatological disease | 1                            |

| <b>Read/OXMIS term</b>                          | <b>Disease category</b> | <b>Charlson score weight</b> |
|-------------------------------------------------|-------------------------|------------------------------|
| RHEUMATISM MUSCULAR                             | Rheumatological disease | 1                            |
| Rheumatoid arthritis of acromioclavicular joint | Rheumatological disease | 1                            |
| Rheumatoid lung                                 | Rheumatological disease | 1                            |
| ACROSCLEROSIS                                   | Rheumatological disease | 1                            |
| ACUTE SYSTEMIC LUPUS ERYTHEMATOSUS              | Rheumatological disease | 1                            |
| Polyneuropathy in rheumatoid arthritis          | Rheumatological disease | 1                            |
| SYSTEMIC LUPUS ERYTHEMATOSUS                    | Rheumatological disease | 1                            |
| RHEUMATIC ARTHRITIS                             | Rheumatological disease | 1                            |



**Table S8. ICD-10 codes for identifying comorbidities to calculate the Charlson comorbidity index**

| ICD-10 | Description                 | weight |
|--------|-----------------------------|--------|
| I25.2  | Myocardial infarction       | 1      |
| I09.9  | Congestive heart failure    | 1      |
| I11.0  | Congestive heart failure    | 1      |
| I13.0  | Congestive heart failure    | 1      |
| I13.2  | Congestive heart failure    | 1      |
| I25.5  | Congestive heart failure    | 1      |
| I42.0  | Congestive heart failure    | 1      |
| I42.5  | Congestive heart failure    | 1      |
| I42.6  | Congestive heart failure    | 1      |
| I42.7  | Congestive heart failure    | 1      |
| I42.8  | Congestive heart failure    | 1      |
| I42.9  | Congestive heart failure    | 1      |
| P29.0  | Congestive heart failure    | 1      |
| I73.1  | Peripheral vascular disease | 1      |
| I73.8  | Peripheral vascular disease | 1      |
| I73.9  | Peripheral vascular disease | 1      |
| I77.1  | Peripheral vascular disease | 1      |
| I79.0  | Peripheral vascular disease | 1      |
| I79.2  | Peripheral vascular disease | 1      |
| K55.1  | Peripheral vascular disease | 1      |
| K55.8  | Peripheral vascular disease | 1      |
| K55.9  | Peripheral vascular disease | 1      |
| Z95.8  | Peripheral vascular disease | 1      |
| Z95.9  | Peripheral vascular disease | 1      |
| H34.0  | Cerebrovascular disease     | 1      |
| F05.1  | Dementia                    | 1      |
| G31.1  | Dementia                    | 1      |
| I27.8  | Chronic pulmonary disease   | 1      |
| I27.9  | Chronic pulmonary disease   | 1      |
| J68.4  | Chronic pulmonary disease   | 1      |
| J70.1  | Chronic pulmonary disease   | 1      |
| J70.3  | Chronic pulmonary disease   | 1      |
| M31.5  | Rheumatic disease           | 1      |
| M35.1  | Rheumatic disease           | 1      |
| M35.3  | Rheumatic disease           | 1      |
| M36.0  | Rheumatic disease           | 1      |
| K70.0  | Mild liver disease          | 1      |
| K70.1  | Mild liver disease          | 1      |
| K70.2  | Mild liver disease          | 1      |
| K70.3  | Mild liver disease          | 1      |
| K70.9  | Mild liver disease          | 1      |
| K71.3  | Mild liver disease          | 1      |
| K71.4  | Mild liver disease          | 1      |
| K71.5  | Mild liver disease          | 1      |

|       |                                       |   |
|-------|---------------------------------------|---|
| K71.7 | Mild liver disease                    | 1 |
| K76.0 | Mild liver disease                    | 1 |
| K76.2 | Mild liver disease                    | 1 |
| K76.3 | Mild liver disease                    | 1 |
| K76.4 | Mild liver disease                    | 1 |
| K76.8 | Mild liver disease                    | 1 |
| K76.9 | Mild liver disease                    | 1 |
| Z94.4 | Mild liver disease                    | 1 |
| E10.0 | Diabetes without chronic complication | 1 |
| E10.1 | Diabetes without chronic complication | 1 |
| E10.6 | Diabetes without chronic complication | 1 |
| E10.8 | Diabetes without chronic complication | 1 |
| E10.9 | Diabetes without chronic complication | 1 |
| E11.0 | Diabetes without chronic complication | 1 |
| E11.1 | Diabetes without chronic complication | 1 |
| E11.6 | Diabetes without chronic complication | 1 |
| E11.8 | Diabetes without chronic complication | 1 |
| E11.9 | Diabetes without chronic complication | 1 |
| E12.0 | Diabetes without chronic complication | 1 |
| E12.1 | Diabetes without chronic complication | 1 |
| E12.6 | Diabetes without chronic complication | 1 |
| E12.8 | Diabetes without chronic complication | 1 |
| E12.9 | Diabetes without chronic complication | 1 |
| E13.0 | Diabetes without chronic complication | 1 |
| E13.1 | Diabetes without chronic complication | 1 |
| E13.6 | Diabetes without chronic complication | 1 |
| E13.8 | Diabetes without chronic complication | 1 |
| E13.9 | Diabetes without chronic complication | 1 |
| E14.0 | Diabetes without chronic complication | 1 |
| E14.1 | Diabetes without chronic complication | 1 |
| E14.6 | Diabetes without chronic complication | 1 |
| E14.8 | Diabetes without chronic complication | 1 |
| E14.9 | Diabetes without chronic complication | 1 |
| E10.2 | Diabetes with chronic complication    | 2 |
| E10.3 | Diabetes with chronic complication    | 2 |
| E10.4 | Diabetes with chronic complication    | 2 |
| E10.5 | Diabetes with chronic complication    | 2 |
| E10.7 | Diabetes with chronic complication    | 2 |
| E11.2 | Diabetes with chronic complication    | 2 |
| E11.3 | Diabetes with chronic complication    | 2 |
| E11.4 | Diabetes with chronic complication    | 2 |
| E11.5 | Diabetes with chronic complication    | 2 |
| E11.7 | Diabetes with chronic complication    | 2 |
| E12.2 | Diabetes with chronic complication    | 2 |
| E12.3 | Diabetes with chronic complication    | 2 |
| E12.4 | Diabetes with chronic complication    | 2 |
| E12.5 | Diabetes with chronic complication    | 2 |

|       |                                    |   |
|-------|------------------------------------|---|
| E12.7 | Diabetes with chronic complication | 2 |
| E13.2 | Diabetes with chronic complication | 2 |
| E13.3 | Diabetes with chronic complication | 2 |
| E13.4 | Diabetes with chronic complication | 2 |
| E13.5 | Diabetes with chronic complication | 2 |
| E13.7 | Diabetes with chronic complication | 2 |
| E14.2 | Diabetes with chronic complication | 2 |
| E14.3 | Diabetes with chronic complication | 2 |
| E14.4 | Diabetes with chronic complication | 2 |
| E14.5 | Diabetes with chronic complication | 2 |
| E14.7 | Diabetes with chronic complication | 2 |
| G04.1 | Hemiplegia or paraplegia           | 2 |
| G11.4 | Hemiplegia or paraplegia           | 2 |
| G80.1 | Hemiplegia or paraplegia           | 2 |
| G80.2 | Hemiplegia or paraplegia           | 2 |
| G83.0 | Hemiplegia or paraplegia           | 2 |
| G83.1 | Hemiplegia or paraplegia           | 2 |
| G83.2 | Hemiplegia or paraplegia           | 2 |
| G83.3 | Hemiplegia or paraplegia           | 2 |
| G83.9 | Hemiplegia or paraplegia           | 2 |
| I12.0 | Renal disease                      | 2 |
| I13.1 | Renal disease                      | 2 |
| N03.2 | Renal disease                      | 2 |
| N03.3 | Renal disease                      | 2 |
| N03.4 | Renal disease                      | 2 |
| N03.5 | Renal disease                      | 2 |
| N03.6 | Renal disease                      | 2 |
| N03.7 | Renal disease                      | 2 |
| N05.2 | Renal disease                      | 2 |
| N05.3 | Renal disease                      | 2 |
| N05.4 | Renal disease                      | 2 |
| N05.5 | Renal disease                      | 2 |
| N05.6 | Renal disease                      | 2 |
| N05.7 | Renal disease                      | 2 |
| N25.0 | Renal disease                      | 2 |
| Z49.0 | Renal disease                      | 2 |
| Z49.1 | Renal disease                      | 2 |
| Z49.2 | Renal disease                      | 2 |
| Z94.0 | Renal disease                      | 2 |
| Z99.2 | Renal disease                      | 2 |
| I85.0 | Moderate or severe liver disease   | 2 |
| I85.9 | Moderate or severe liver disease   | 2 |
| I86.4 | Moderate or severe liver disease   | 2 |
| I98.2 | Moderate or severe liver disease   | 2 |
| K70.4 | Moderate or severe liver disease   | 2 |
| K71.1 | Moderate or severe liver disease   | 2 |
| K72.1 | Moderate or severe liver disease   | 2 |

|       |                                  |   |
|-------|----------------------------------|---|
| K72.9 | Moderate or severe liver disease | 2 |
| K76.5 | Moderate or severe liver disease | 2 |
| K76.6 | Moderate or severe liver disease | 2 |
| K76.7 | Moderate or severe liver disease | 2 |

**Table S9. ICD-10 codes for frailty score**

| ICD-10 code | Description                                                                                          | Score |
|-------------|------------------------------------------------------------------------------------------------------|-------|
| F00         | Dementia in Alzheimer's disease                                                                      | 7.1   |
| G81         | Hemiplegia                                                                                           | 4.4   |
| G30         | Alzheimer's disease                                                                                  | 4     |
| I69         | Sequelae of cerebrovascular disease (secondary codes)                                                | 3.7   |
| R29         | Other symptoms and signs involving the nervous and musculoskeletal systems (R29??6 Tendency to fall) | 3.6   |
| N39         | Other disorders of urinary system (includes urinary tract infection and urinary incontinence)        | 3.2   |
| F05         | Delirium, not induced by alcohol and other psychoactive substances                                   | 3.2   |
| W19         | Unspecified fall                                                                                     | 3.2   |
| S00         | Superficial injury of head                                                                           | 3.2   |
| R31         | Unspecified haematuria                                                                               | 3     |
| B96         | Other bacterial agents as the cause of diseases classified to other chapters (secondary code)        | 2.9   |
| R41         | Other symptoms and signs involving cognitive functions and awareness                                 | 2.7   |
| R26         | Abnormalities of gait and mobility                                                                   | 2.6   |
| I67         | Other cerebrovascular diseases                                                                       | 2.6   |
| R56         | Convulsions, not elsewhere classified                                                                | 2.6   |
| R40         | Somnolence, stupor and coma                                                                          | 2.5   |
| T83         | Complications of genitourinary prosthetic devices, implants and grafts                               | 2.4   |
| S06         | Intracranial injury                                                                                  | 2.4   |
| S42         | Fracture of shoulder and upper arm                                                                   | 2.3   |
| E87         | Other disorders of fluid, electrolyte and acid- base balance                                         | 2.3   |
| M25         | Other joint disorders, not elsewhere classified                                                      | 2.3   |
| E86         | Volume depletion                                                                                     | 2.3   |
| R54         | Senility                                                                                             | 2.2   |
| Z50         | Care involving use of rehabilitation procedures                                                      | 2.1   |
| F03         | Unspecified dementia                                                                                 | 2.1   |
| W18         | Other fall on same level                                                                             | 2.1   |
| Z75         | Problems related to medical facilities and other health care                                         | 2     |
| F01         | Vascular dementia                                                                                    | 2     |
| S80         | Superficial injury of lower leg                                                                      | 2     |
| L03         | Cellulitis                                                                                           | 2     |
| H54         | Blindness and low vision                                                                             | 1.9   |
| E53         | Deficiency of other B group vitamins                                                                 | 1.9   |
| Z60         | Problems related to social environment                                                               | 1.8   |
| G20         | Parkinson's disease                                                                                  | 1.8   |
| R55         | Syncope and collapse                                                                                 | 1.8   |
| S22         | Fracture of rib(s), sternum and thoracic spine                                                       | 1.8   |
| K59         | Other functional intestinal disorders                                                                | 1.8   |
| N17         | Acute renal failure                                                                                  | 1.8   |
| L89         | Decubitus ulcer                                                                                      | 1.7   |
| Z22         | Carrier of infectious disease                                                                        | 1.7   |
| B95         | Streptococcus and staphylococcus as the cause of diseases classified to other chapters               | 1.7   |

|     |                                                                         |     |
|-----|-------------------------------------------------------------------------|-----|
| L97 | Ulcer of lower limb, not elsewhere classified                           | 1.6 |
| R44 | Other symptoms and signs involving general sensations and perceptions   | 1.6 |
| K26 | Duodenal ulcer                                                          | 1.6 |
| I95 | Hypotension                                                             | 1.6 |
| N19 | Unspecified renal failure                                               | 1.6 |
| A41 | Other septicaemia                                                       | 1.6 |
| Z87 | Personal history of other diseases and conditions                       | 1.5 |
| J96 | Respiratory failure, not elsewhere classified                           | 1.5 |
| X59 | Exposure to unspecified factor                                          | 1.5 |
| M19 | Other arthrosis                                                         | 1.5 |
| G40 | Epilepsy                                                                | 1.5 |
| M81 | Osteoporosis without pathological fracture                              | 1.4 |
| S72 | Fracture of femur                                                       | 1.4 |
| S32 | Fracture of lumbar spine and pelvis                                     | 1.4 |
| E16 | Other disorders of pancreatic internal secretion                        | 1.4 |
| R94 | Abnormal results of function studies                                    | 1.4 |
| N18 | Chronic renal failure                                                   | 1.4 |
| R33 | Retention of urine                                                      | 1.3 |
| R69 | Unknown and unspecified causes of morbidity                             | 1.3 |
| N28 | Other disorders of kidney and ureter, not elsewhere classified          | 1.3 |
| R32 | Unspecified urinary incontinence                                        | 1.2 |
| G31 | Other degenerative diseases of nervous system, not elsewhere classified | 1.2 |
| Y95 | Nosocomial condition                                                    | 1.2 |
| S09 | Other and unspecified injuries of head                                  | 1.2 |
| R45 | Symptoms and signs involving emotional state                            | 1.2 |
| G45 | Transient cerebral ischaemic attacks and related syndromes              | 1.2 |
| Z74 | Problems related to care-provider dependency                            | 1.1 |
| M79 | Other soft tissue disorders, not elsewhere classified                   | 1.1 |
| W06 | Fall involving bed                                                      | 1.1 |
| S01 | Open wound of head                                                      | 1.1 |
| A04 | Other bacterial intestinal infections                                   | 1.1 |
| A09 | Diarrhoea and gastroenteritis of presumed infectious origin             | 1.1 |
| J18 | Pneumonia, organism unspecified                                         | 1.1 |
| J69 | Pneumonitis due to solids and liquids                                   | 1   |
| R47 | Speech disturbances, not elsewhere classified                           | 1   |
| E55 | Vitamin D deficiency                                                    | 1   |
| Z93 | Artificial opening status                                               | 1   |
| R02 | Gangrene, not elsewhere classified                                      | 1   |
| R63 | Symptoms and signs concerning food and fluid intake                     | 0.9 |
| H91 | Other hearing loss                                                      | 0.9 |
| W10 | Fall on and from stairs and steps                                       | 0.9 |
| W01 | Fall on same level from slipping, tripping and stumbling                | 0.9 |
| E05 | Thyrotoxicosis [hyperthyroidism]                                        | 0.9 |
| M41 | Scoliosis                                                               | 0.9 |
| R13 | Dysphagia                                                               | 0.8 |
| Z99 | Dependence on enabling machines and devices                             | 0.8 |

|     |                                                                           |     |
|-----|---------------------------------------------------------------------------|-----|
| U80 | Agent resistant to penicillin and related antibiotics                     | 0.8 |
| M80 | Osteoporosis with pathological fracture                                   | 0.8 |
| K92 | Other diseases of digestive system                                        | 0.8 |
| I63 | Cerebral Infarction                                                       | 0.8 |
| N20 | Calculus of kidney and ureter                                             | 0.7 |
| F10 | Mental and behavioural disorders due to use of alcohol                    | 0.7 |
| Y84 | Other medical procedures as the cause of abnormal reaction of the patient | 0.7 |
| R00 | Abnormalities of heart beat                                               | 0.7 |
| J22 | Unspecified acute lower respiratory infection                             | 0.7 |
| Z73 | Problems related to life-management difficulty                            | 0.6 |
| R79 | Other abnormal findings of blood chemistry                                | 0.6 |
| Z91 | Personal history of risk-factors, not elsewhere classified                | 0.5 |
| S51 | Open wound of forearm                                                     | 0.5 |
| F32 | Depressive episode                                                        | 0.5 |
| M48 | Spinal stenosis (secondary code only)                                     | 0.5 |
| E83 | Disorders of mineral metabolism                                           | 0.4 |
| M15 | Polyarthrosis                                                             | 0.4 |
| D64 | Other anaemias                                                            | 0.4 |
| L08 | Other local infections of skin and subcutaneous tissue                    | 0.4 |
| R11 | Nausea and vomiting                                                       | 0.3 |
| K52 | Other noninfective gastroenteritis and colitis                            | 0.3 |
| R50 | Fever of unknown origin                                                   | 0.1 |

**Table S10. Mean value and standardised mean difference of selected covariates in propensity score before and after balance**

| Variables        | Mean in treat | Mean in untreated | SMD    |
|------------------|---------------|-------------------|--------|
| Age 70-75        | 0.1           | 0.1               | -0.001 |
| Age 75-80        | 0.09          | 0.09              | 0.000  |
| Age 80-85        | 0.06          | 0.06              | -0.001 |
| Age 85-90        | 0.04          | 0.04              | -0.009 |
| Age 90+          | 0.04          | 0.04              | -0.009 |
| CCI low          | 0.87          | 0.87              | 0.000  |
| CCI intermediate | 0.1           | 0.1               | 0.002  |
| CCI high         | 0.03          | 0.03              | -0.003 |
| Non frail        | 0.92          | 0.91              | 0.015  |
| Pre frail        | 0.06          | 0.07              | -0.008 |
| Frail            | 0.02          | 0.02              | -0.014 |
| IMD (1-2)        | 0.23          | 0.21              | 0.049  |
| IMD (3-4)        | 0.19          | 0.18              | 0.013  |
| IMD (5-6)        | 0.16          | 0.16              | -0.006 |
| IMD (7-8)        | 0.07          | 0.08              | -0.018 |
| IMD (9-10)       | 0.09          | 0.11              | -0.041 |

(Note) All variables in propensity score matching were binary variables. SMD: Standardised mean difference; CCI: Charlson Comorbidity Index; IMD: index of multiple deprivation



**Table S11. Tumour characteristics of the study cohort**

| Factors             |              | Younger age        |                 | Older age          |               |
|---------------------|--------------|--------------------|-----------------|--------------------|---------------|
|                     |              | Surgery (n=33,341) | PET (n=2,354)   | Surgery (n=16,096) | PET (n=7,013) |
| <b>Tumour grade</b> | G1           | 6788 (20.36%)      | 137 (5.82%)     | 2380 (14.79%)      | 588 (8.38%)   |
|                     | G2           | 15908 (47.71%)     | 346 (14.70%)    | 7895 (49.05%)      | 1918 (27.35%) |
|                     | G3           | 5910 (17.73%)      | 143 (6.07%)     | 3224 (20.03%)      | 476 (6.79%)   |
|                     | GX           | 1136 (3.41%)       | 305 (12.96%)    | 1033 (6.42%)       | 1921 (27.39%) |
|                     | Missing      | 3599 (10.79%)      | 1423 (60.45%)   | 1564 (9.72%)       | 2110 (30.09%) |
| <b>NPI</b>          | Median (IQR) | 3.36 (3.14-4.38)   | 3.31 (3.1-4.22) | 3.6 (3.24-4.5)     | 3.3 (2.4-3.6) |
|                     | I            | 145 (0.43%)        | -               | 73 (0.45%)         | 5 (0.07%)     |
|                     | II           | 1892 (5.67%)       | 7 (0.30%)       | 434 (2.70%)        | 0 (0.00%)     |
|                     | III          | 3575 (10.72%)      | 10 (0.42%)      | 1039 (6.46%)       | 7 (0.10%)     |
|                     | IV           | 4324 (12.97%)      | 14 (0.59%)      | 2057 (12.78%)      | 9 (0.13%)     |
|                     | V            | 1009 (3.03%)       | 1 (0.04%)       | 543 (3.37%)        | 1 (0.01%)     |
|                     | Missing      | 22396 (67.17%)     | 2322 (98.64%)   | 11950 (74.24%)     | 6991 (99.69%) |
| <b>Her-2 status</b> | Positive     | 1512 (4.53%)       | 29 (1.23%)      | 553 (3.44%)        | 132 (1.88%)   |
|                     | Negative     | 9837 (29.50%)      | 172 (7.31%)     | 3970 (24.66%)      | 945 (13.47%)  |
|                     | Unknown      | 21992 (65.96%)     | 2153 (91.46%)   | 11573 (71.90%)     | 5936 (84.64%) |

(Note) PET: primary endocrine therapy; IQR: Interquartile range; NPI: Nottingham prognosis.

## Supplementary Section S2. Survival time of study cohort between surgery and PET by levels of frailty

| Group            | Survival time (Median, IQR) |               |         |
|------------------|-----------------------------|---------------|---------|
|                  | Surgery                     | PET           | P value |
| <b>HFRS</b>      |                             |               |         |
| Non-frail        | 6.8 (4.0-10.6)              | 3.2 (1.4-6.0) | <0.0001 |
| Pre frail        | 4.1 (2.5-6.7)               | 2.3 (0.9-3.9) | <0.0001 |
| Frail            | 2.8 (1.6-4.8)               | 1.7 (0.7-3.0) | <0.0001 |
| <b>CCI</b>       |                             |               |         |
| Low CCI          | 7.0 (4.0-10.9)              | 3.0 (1.2-5.6) | <0.0001 |
| Intermediate CCI | 5.1 (3.1-7.7)               | 2.5 (1.0-4.4) | <0.0001 |
| High CCI         | 3.8 (2.2-6.1)               | 2.3 (1.0-3.8) | <0.0001 |

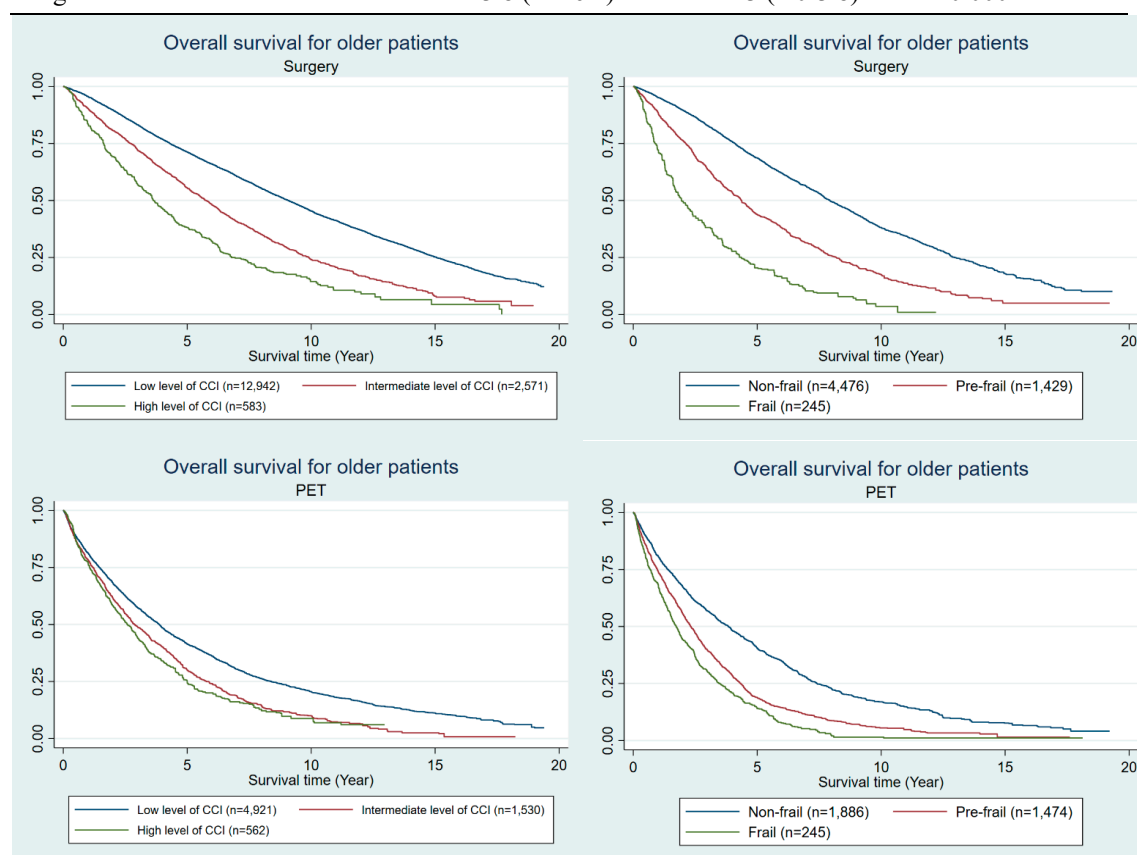

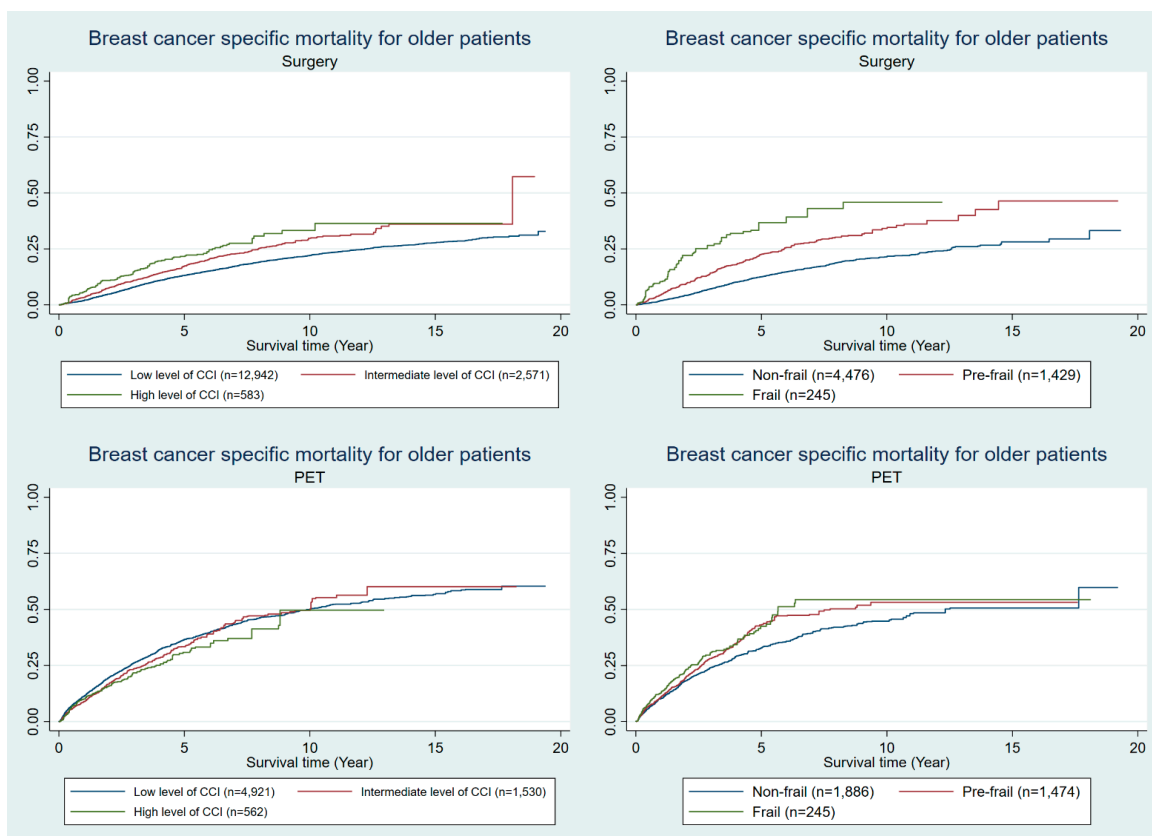

**Table S12. Competing risk regression of all selected covariates for cohort study**

| Factors                         | Model 1        |         | Model 2        |         |
|---------------------------------|----------------|---------|----------------|---------|
|                                 | SHR (95% CI)   | P value | SHR (95% CI)   | P value |
| Age                             | 1.1 (1.1, 1.1) | <0.001  | 1.1 (1.0, 1.1) | <0.001  |
| Age (time-varying)              | 1.0 (1.0, 1.0) | 0.108   | 1.0 (1.0, 1.0) | 0.335   |
| Treatment (reference surgery)   |                |         |                |         |
| PET                             | 1.9 (1.8, 2.0) | <0.001  | 1.2 (1.1, 1.3) | <0.001  |
| HFRS (reference: non-frail)     |                |         |                |         |
| Pre-frail                       | 1.4 (1.3, 1.5) | <0.001  | 1.3 (1.2, 1.4) | <0.001  |
| Frail                           | 2.0 (1.9, 2.2) | <0.001  | 1.4 (1.2, 1.6) | <0.001  |
| CCI (reference: low level)      |                |         |                |         |
| Intermediate                    | 1.3 (1.3, 1.4) | <0.001  | 1.3 (1.2, 1.4) | <0.001  |
| High                            | 1.8 (1.7, 1.9) | <0.001  | 1.6 (1.4, 1.8) | <0.001  |
| IMD (reference: IMD decile 1-2) |                |         |                |         |
| 3-4                             | 1.0 (1.0, 1.1) | <0.001  | 1.1 (1.0, 1.2) | 0.095   |
| 5-6                             | 1.0 (1.0, 1.1) | <0.001  | 1.1 (1.0, 1.2) | 0.125   |
| 7-8                             | 1.1 (1.0, 1.2) | <0.001  | 1.1 (1.0, 1.2) | 0.071   |
| 9-10                            | 1.2 (1.1, 1.3) | <0.001  | 1.1 (1.0, 1.2) | 0.001   |
| No observations                 | 1.2 (1.1, 1.3) | <0.001  | 1.1 (1.0, 1.2) | 0.032   |

(Note) HR: hazard ratio; SHR: subdistribution hazard ratio; CI: confidence interval; PET: primary endocrine therapy; HFRS: hospital frailty risk score; CCI: Charlson comorbidity index; IMD: Index of Multiple Deprivation; \*Model 1 compared the competing risk between all-cause death and non-cancer cause death; Model 2 compared the competing risk between other cause death and breast cancer-specific death.

**Figure S2. Cumulative incidence function of competing risk between PET and surgery in three level of hospital frailty risk scores**

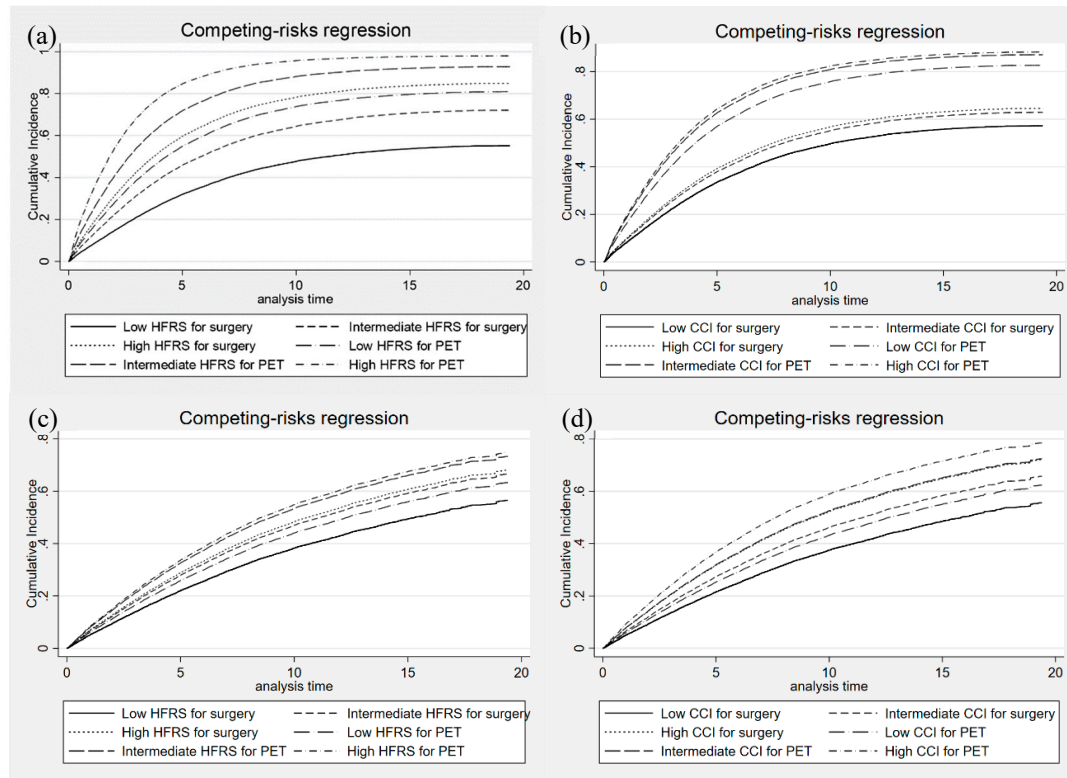

(Note) HFRS: hospital frailty risk score; CCI: Charlson comorbidity index.

- \*Model 1 compared the competing risk between all-cause death and non-cancer cause death;
- Model 2 compared the competing risk between other causes of death and breast cancer-specific death.
- (a) Cumulative incidence function between surgery and PET by three levels of HFRS in Model 1;
- (b) Cumulative incidence function between surgery and PET by three levels of CCI in Model 1;
- (c) Cumulative incidence function between surgery and PET by three levels of HFRS in Model 2;
- (d) Cumulative incidence function between surgery and PET by three levels of CCI in Model 2

**Figure S3. Cumulative incidence function of competing risk in high level of frailty between surgery and PET**

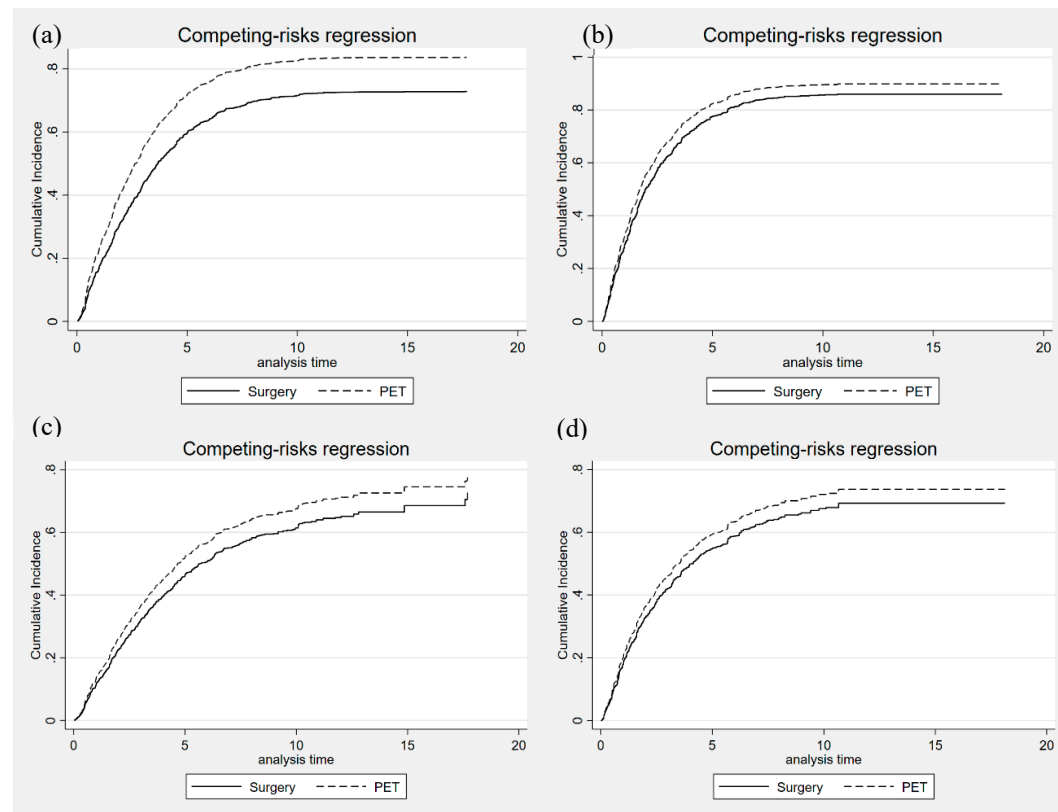

(Note) \*Model 1 compared the competing risk between all-cause death and non-cancer cause death; Model 2 compared the competing risk between other cause death and breast cancer specific death.

(a) Cumulative incidence function with high level of CCI by surgery and PET in Model 1; (b) Cumulative incidence function with high level of HFRS by surgery and PET in Model 1 (c) Cumulative incidence function with high level of CCI by surgery and PET in Model 2; (d) Cumulative incidence function with high level of HFRS by surgery and PET in Model 2.
